# Supplementary material for: Mechanochemical Friedel–Crafts acylations
Source: PubMed Central journal article supplement (PMC6604704; doi:10.3762/bjoc.15.130), 2019-06-17
Supplement: Beilstein_J_Org_Chem-15-1313-s001.pdf [file Beilstein_J_Org_Chem-15-1313-s001.pdf]

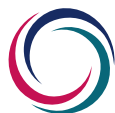

## Supporting Information

for

### **Mechanochemical Friedel–Crafts acylations**

Mateja Đud, Anamarija Briš, Iva Jušinski, Davor Gracin and Davor Margetić

*Beilstein J. Org. Chem.* **2019**, *15*, 1313–1320. [doi:10.3762/bjoc.15.130](https://doi.org/10.3762/bjoc.15.130)

**Details of experimental procedures, spectroscopic  
characterization data of compounds and computational  
procedures**

## General

Commercially available reagents were supplied from the following chemical manufacturers: Sigma-Aldrich, Alfa Aesar or Acros Organics and used without further purification, unless otherwise indicated. Solvents were obtained from Kemika, Sigma-Aldrich or VWR Chemicals. For the purpose of carrying out the reaction under dry conditions, the solvents were dried using standard methods.

Chromatography: Thin layer chromatography on alumina coated silica gel plates (silica gel 60 F<sub>254</sub>, Merck) was used to monitor the course of the reaction. The analysis was performed using UV lamps of wavelengths 254 and 365 nm. Purification and separation of the synthesized products were performed by column chromatography using silica gel (Silica gel 60, 0.063-0.200 mm, Merck). Elution solvents and their ratios are specified for each individual synthesis.

Mehanochemical reactions: Grinding reactions were performed on a vibrational mill Retsch MM400 at a frequency of 30 Hz using 16 mL stainless steel vessels and one 12 mm steel ball. Retsch planetary ball mill PM-200, 500 rpm, using 25 mL stainless steel vessels and 30x3 mm steel balls.

High pressure reactions: High-pressure experiments were performed using a high pressure piston-cylinder apparatus (Unipress, Polish Academy of Sciences) and pentane as piezotransmitting liquid in Teflon cells (V=1.5 mL).

Microwave reactions: Reactions were conducted in a CEM Discover LabmateTH/ExplorerPLS single-mode microwave reactor using the closed reaction vessel technique with power=125 W.

Nuclear magnetic resonance (NMR): The compounds were identified by one-dimensional <sup>1</sup>H and <sup>13</sup>C spectroscopy, using Bruker Avance 300 MHz and Bruker Avance 600 MHz spectrometers. Commercially available deuterated solvents were used for the recording. Chemical shifts ( $\delta$ ) are expressed in ppm according to tetramethylsilane (TMS) as internal standard, and coupling constants ( $J$ ) are expressed in Hertz (Hz). The following abbreviations were used to denote multiplicity in <sup>1</sup>H spectra: s, singlet; d, doublet; dd, doublet of doublets; t, triplet; m, multiplet; brs, broad signal.

Infrared spectroscopy: Infrared spectra (FTIR-ATR) were recorded using Fourier Transform - Infrared Attenuated Total Reflection PerkinElmer UATR Two Spectrometer, ranging from 400 cm<sup>-1</sup> to 4000 cm<sup>-1</sup>.

Raman in situ spectroscopy: Retsch MM300 ball mill was operated at 30 Hz to conduct the milling reactions in poly(methyl methacrylate) (PMMA) milling vessels ( $V = 14$  mL) with two 7 mm diameter stainless steel balls. A portable Raman spectroscopy system was assembled from the PD-LD LS2 laser source ( $\lambda = 784$  nm) and Maya spectrometer (Ocean Optics). The focus of the Raman probe was adjusted at a distance of  $\approx 8$  mm from the Raman probe to be inside the vessel.

### General procedure for mechanochemical Friedel–Crafts acylations

**Method A.** A mixture of aromatic substrate (0.46 mmol), phthalic anhydride (1 equiv) and  $\text{AlCl}_3$  (2.5 equiv.) was placed in a 16 mL stainless steel jar, together with one stainless steel 12 mm ball in Retsch MM400 ball mill. The mixture was ball milled for 1 hour at 30 Hz. The reaction mixture was suspended in water, pH adjusted with conc. HCl. The precipitate was collected by filtration and subjected to column chromatography on silicagel using dichloromethane to remove unreacted aromatics, then product was eluted with DCM/10% methanol.

**Caution:** Aluminium trichloride dust is very irritant and corrosive to all tissues and reacts violently with water. It readily undergoes violent chemical changes at elevated temperatures and pressures. Prior to its handling, material safety data sheet (MSDS) should be consulted. The necessary precautionary measures are essential for the handling of the material. Wear appropriate eye protection (goggles, face shield) to prevent eye contact, gloves to prevent skin contact and perform all handling in well-ventilated fumehood to prevent inhalation.<sup>1</sup>

1-(*o*-Carboxybenzoyl)pyrene (**3**)<sup>2</sup>

<sup>1</sup>H NMR ( $\text{CDCl}_3$ )  $\delta$  9.22 (d,  $J=9.8$  Hz, 1H, H-10), 8.27-8.20 (m, 3H), 8.15 (d,  $J=8.7$  Hz, 1H), 8.09-7.94 (m, 3H), 7.86-7.79 (m, 2H), 7.68-7.60 (m, 1H), 7.57-7.49 (m, 2H).

<sup>1</sup>H NMR ( $\text{DMSO}-d_6$ )  $\delta$  13.06 (brs, 1H, COOH), 9.17 (d,  $J=9.1$  Hz, 1H, H-10), 8.44 (d,  $J=7.7$  Hz, 2H, H-6, H-8), 8.43 (d,  $J=9.1$  Hz, 1H, H-9), 8.36 (d,  $J=9.1$  Hz, 1H, H-5), 8.27-8.16 (m, 3H, H-3, H-4, H-7), 7.99 (dd,  $J=7.5, 1.6$  Hz, 1H, H-6'), 7.84 (d,  $J=8.1$  Hz, 1H, H-2), 7.82-7.69 (m, 2H, H-4', H-5'), 7.64 (dd,  $J=7.3, 1.4$  Hz, 1H, H-3').

FTIR-ATR  $\nu_{\text{max}}/\text{cm}^{-1}$ : 3038, 2921, 2620, 1716 (C=O).

4-Oxo-4-(pyren-1-yl)butanoic acid (**4**)<sup>3</sup>

<sup>1</sup>H NMR (DMSO-*d*<sub>6</sub>) δ 8.75 (d, *J*=9.7 Hz, 1H), 8.57 (d, *J*=8.4 Hz, 1H), 8.42-8.22 (m, 6H), 8.14 (t, *J*=7.6 Hz, 1H), 3.44 (t, *J*=6.0 Hz, 2H, CH<sub>2</sub>), 2.69 (t, *J*=6.0 Hz, 2H, CH<sub>2</sub>).

FTIR-ATR ν<sub>max</sub>/cm<sup>-1</sup>: 3041, 2912, 2671, 1692, 1664 (C=O).

1-Benzoylpyrene (**5**)<sup>4</sup>

<sup>1</sup>H NMR (CDCl<sub>3</sub>) δ 8.35 (d, *J*=8.7 Hz, 1H), 8.22-8.10 (m, 4H), 8.09-7.98 (m, 4H), 7.90-7.85 (m, 2H), 7.62-7.55 (m, 1H), 7.47-7.41 (m, 2H).

FTIR-ATR ν<sub>max</sub>/cm<sup>-1</sup>: 3043, 2248, 1922, 1805, 1651 (C=O).

4-Methyl-1-(*o*-carboxybenzoyl)benzene (**8**)<sup>5</sup>

<sup>1</sup>H NMR (DMSO-*d*<sub>6</sub>) δ 7.95-7.89 (m, 1H), 7.49-7.41 (m, 2H), 7.44 (d, *J*=8.4 Hz, 2H), 7.20 (d, *J*=8.4 Hz, 2H), 7.13-7.08 (m, 1H), 3.40 (brs, 1H, OH), 2.33 (s, 3H, CH<sub>3</sub>).

FTIR-ATR ν<sub>max</sub>/cm<sup>-1</sup>: 3058, 2963, 1655 (C=O).

3,4-Dimethyl-1-(*o*-carboxybenzoyl)benzene (**9**)<sup>6</sup>

<sup>1</sup>H NMR (DMSO-*d*<sub>6</sub>) δ 7.94-7.89 (m, 1H), 7.49-7.44 (m, 2H), 7.39-7.36 (m, 1H), 7.25 (d, *J*=7.6 Hz, 1H), 7.15 (d, *J*=7.6 Hz, 1H), 7.13-7.10 (m, 1H), 3.37 (brs, 1H, OH), 2.24 (s, 3H, CH<sub>3</sub>), 2.20 (s, 3H, CH<sub>3</sub>).

FTIR-ATR ν<sub>max</sub>/cm<sup>-1</sup>: 3054, 1710 (C=O).

1,4-Dimethyl-2-(*o*-carboxybenzoyl)benzene (**10**)<sup>7</sup>

<sup>1</sup>H NMR (CDCl<sub>3</sub>) δ 8.01 (d, *J*=7.8 Hz, 1H), 7.68-7.61 (m, 1H), 7.59-7.53 (m, 1H), 7.42 (d, *J*=7.2 Hz, 1H), 7.16 (s, 2H), 6.99 (s, 1H), 2.55 (s, 3H, CH<sub>3</sub>), 2.21 (s, 3H, CH<sub>3</sub>).

FTIR-ATR ν<sub>max</sub>/cm<sup>-1</sup>: 3019, 2925, 2671, 2546, 1674 (C=O).

3,4-Dimethoxy-1-(*o*-carboxybenzoyl)benzene (**11**)<sup>8,9</sup>

<sup>1</sup>H NMR (CDCl<sub>3</sub>) δ 8.11-8.04 (m, 1H), 7.67-7.52 (m, 3H), 7.39-7.34 (m, 1H), 7.06 (d, *J*=8.5 Hz, 1H), 6.77 (d, *J*=8.5 Hz, 1H), 3.92 (s, 3H, OCH<sub>3</sub>), 3.91 (s, 3H, OCH<sub>3</sub>)

<sup>1</sup>H NMR (DMSO-*d*<sub>6</sub>) δ 7.95 (d, *J*=7.5 Hz, 1H), 7.72-7.57 (m, 2H), 7.38 (s, 1H), 7.35 (d, *J*=7.5 Hz, 1H), 7.00-6.92 (m, 2H), 3.79 (s, 3H, OCH<sub>3</sub>), 3.78 (s, 3H, OCH<sub>3</sub>).

<sup>13</sup>C NMR (DMSO-*d*<sub>6</sub>) δ 195.5 (C=O), 167.5 (C=O), 153.5, 149.2, 141.9, 132.5, 130.9, 130.4, 130.1, 129.9, 127.9, 125.1, 111.2, 110.6, 56.2 (OCH<sub>3</sub>), 55.9 (OCH<sub>3</sub>).

FTIR-ATR ν<sub>max</sub>/cm<sup>-1</sup>: 3077, 2935, 2847, 1715 (C=O).

5-Ethyl-2-hydroxy-1-(*o*-carboxybenzoyl)benzene (**12**)<sup>10</sup>

<sup>1</sup>H NMR (CDCl<sub>3</sub>) δ 11.60 (brs, 1H, OH), 9.47 (brs, 1H, OH), 8.03 (brs, 1H), 7.62 (brs, 1H), 7.52 (brs, 1H), 7.31 (brs, 1H), 7.26 (brs, 1H), 6.92 (d, *J*=8.1 Hz, 1H), 6.83 (s, 1H), 2.38 (q, *J*=7.5 Hz, 2H, CH<sub>2</sub>), 1.02 (t, *J*=7.5 Hz, 3H, CH<sub>3</sub>).

$^{13}\text{C}$  NMR ( $\text{CDCl}_3$ )  $\delta$  202.8 (C=O), 170.9 (C=O), 160.6, 140.5, 136.6, 134.5, 132.7, 131.2, 131.1, 129.7, 127.4, 119.8, 118.1, 27.7 ( $\text{CH}_2$ ), 15.5 ( $\text{CH}_3$ ).

$^1\text{H}$  NMR ( $\text{DMSO}-d_6$ )  $\delta$  12.23 (brs, 1H, COOH), 7.99 (d,  $J=7.1$  Hz, 1H), 7.73-7.59 (m, 2H), 7.44-7.34 (m, 2H), 6.93 (dd,  $J=6.0, 3.0$  Hz, 2H), 2.42 (q,  $J=7.1$  Hz, 2H,  $\text{CH}_2$ ), 1.02 (t,  $J=7.1$  Hz, 3H,  $\text{CH}_3$ ).

$^{13}\text{C}$  NMR ( $\text{DMSO}-d_6$ )  $\delta$  164.7 (C=O), 158.9 (C=O), 140.4, 135.5, 133.9, 131.7, 131.2, 130.4, 129.6 (2C), 126.8, 120.7, 117.6, 29.6 ( $\text{CH}_2$ ), 15.6 ( $\text{CH}_3$ ). (1C unaccounted)

FTIR-ATR  $\nu_{\text{max}}/\text{cm}^{-1}$ : 3060, 2965, 2931, 2872, 1694 (C=O).

#### 4-Methylthio-1-(*o*-carboxybenzoyl)benzene (**13**)<sup>11</sup>

$^1\text{H}$  NMR ( $\text{CDCl}_3$ )  $\delta$  8.07 (d,  $J=7.6$  Hz, 1H), 7.69-7.59 (m, 2H), 7.62 (d,  $J=8.6$  Hz, 2H), 7.59-7.52 (m, 1H), 7.35 (d,  $J=6.9$  Hz, 1H), 7.21 (d,  $J=8.6$  Hz, 1H), 2.49 (s, 3H,  $\text{SCH}_3$ )

$^{13}\text{C}$  NMR ( $\text{CDCl}_3$ )  $\delta$  169.6 (C=O), 146.2 (C=O), 133.4, 133.1, 130.9, 130.0, 129.8, 129.5, 128.1, 127.8, 127.6, 124.9, 14.7 ( $\text{SCH}_3$ )

$^1\text{H}$  NMR ( $\text{DMSO}-d_6$ )  $\delta$  12.95 (brs, 1H, COOH), 7.99 (dd,  $J=7.6, 1.2$  Hz, 1H), 7.75-7.61 (m, 2H), 7.54 (d,  $J=8.5$  Hz, 2H), 7.40 (dd,  $J=7.2, 1.2$  Hz, 1H), 7.34 (d,  $J=8.5$  Hz, 1H), 2.52 (s, 3H,  $\text{SCH}_3$ )

$^{13}\text{C}$  NMR ( $\text{DMSO}-d_6$ )  $\delta$  195.4 (C=O), 166.9 (C=O), 145.4, 141.4, 133.2, 132.3, 129.9, 129.7, 129.6, 129.3, 127.3, 124.8, 33.1 ( $\text{SCH}_3$ ).

FTIR-ATR  $\nu_{\text{max}}/\text{cm}^{-1}$ : 3060, 2921, 2654, 2545, 1721 (C=O).

#### 5-(*o*-Carboxybenzoyl)-1,2,3,4-tetrahydronaphthalene (**14**)<sup>12</sup>

$^1\text{H}$  NMR ( $\text{CDCl}_3$ )  $\delta$  7.70-7.63 (m, 1H), 7.35-7.31 (m, 1H), 7.29-7.21 (m, 2H), 7.14-7.01 (m, 1H), 7.04 (d,  $J=7.2$  Hz, 1H), 6.78 (d,  $J=7.2$  Hz, 1H), 3.62 (brs, 1H, OH), 2.65-2.59 (m, 2H), 2.54-2.49 (m, 2H), 1.69-1.59 (m, 4H).

$^1\text{H}$  NMR ( $\text{DMSO}-d_6$ )  $\delta$  7.94-7.88 (m, 1H), 7.48-7.41 (m, 2H), 7.28-7.22 (m, 2H), 7.13-7.08 (m, 1H), 7.06 (d,  $J=8.1$  Hz, 1H), 3.44 (brs, 1H, OH), 2.76-2.62 (m, 4H, H-5, H-8,  $\text{CH}_2$ ), 1.76-1.68 (m, 4H, H-6, H-7,  $\text{CH}_2$ ).

FTIR-ATR  $\nu_{\text{max}}/\text{cm}^{-1}$ : 2929, 2854, 1660 (C=O).

#### 1-(*o*-Carboxybenzoyl)naphthalene (**15**)<sup>13,14</sup>

$^1\text{H}$  NMR ( $\text{CDCl}_3$ )  $\delta$  8.98 (d,  $J=9.5$  Hz, 1H, H-8), 8.04 (dd,  $J=7.4, 1.1$  Hz, 1H), 7.98 (d,  $J=8.1$  Hz, 1H), 7.89 (d,  $J=8.6$  Hz, 1H), 7.72-7.60 (m, 3H), 7.59-7.53 (m, 2H), 7.44-7.32 (m, 2H), 1.98 (brs, 1H).

FTIR-ATR  $\nu_{\text{max}}/\text{cm}^{-1}$ : 3057, 1659 (C=O).

#### 2-(9-Anthroyl)benzoic acid (**16**)<sup>15</sup>

$^1\text{H}$  NMR ( $\text{DMSO}-d_6$ )  $\delta$  8.87 (s, 1H, H-10), 8.20 (d,  $J=8.3$  Hz, 2H), 8.02 (d,  $J=8.3$  Hz, 2H), 7.72 (d,  $J=7.8$  Hz, 1H), 7.60 (t,  $J=6.8$  Hz, 1H), 7.56 (t,  $J=6.8$  Hz, 2H), 7.51 (t,  $J=8.3$  Hz, 2H), 7.25 (t,  $J=7.3$  Hz, 1H), 6.92 (d,  $J=6.8$  Hz, 1H), 3.3 (brs, 1H).

FTIR-ATR  $\nu_{\text{max}}/\text{cm}^{-1}$ : 3052, 2921, 2657, 2540, 1699 (C=O)

4-Phenyl-1-(*o*-carboxybenzoyl)benzene (**17**)<sup>16</sup>

<sup>1</sup>H NMR (DMSO-*d*<sub>6</sub>) δ 13.25 (brs, 1H, OH), 8.02 (d, *J*=7.5 Hz, 1H), 7.82-7.65 (m, 8H), 7.53-7.40 (m, 4H).

FTIR-ATR  $\nu_{\max}/\text{cm}^{-1}$ : 3053, 3033, 2836, 2679, 2554, 1690 (C=O).

1,4-Dimethylantraquinone (**29**)<sup>17</sup>

<sup>1</sup>H NMR (CDCl<sub>3</sub>) δ 8.22 (dd, *J*=5.8, 3.3 Hz, 2H), 7.76 (dd, *J*=5.8, 3.3 Hz, 2H), 7.44 (s, 2H), 2.81 (s, 6H, CH<sub>3</sub>). (spectroscopic data were obtained from crude mixture)

3-(4-Phenylbenzoyl)propionic acid (Fenbufen<sup>TM</sup>) (**17B**)<sup>18,19</sup>

<sup>1</sup>H NMR (DMSO-*d*<sub>6</sub>) δ 12.18 (brs, 1H, OH), 8.06 (d, *J*=8.7 Hz, 2H), 7.83 (d, *J*=8.7 Hz, 2H), 7.75 (d, *J*=7.9 Hz, 2H), 7.51 (t, *J*=7.2 Hz, 2H), 7.42 (d, *J*=7.2 Hz, 1H), 3.28 (t, *J*=6.2 Hz, 2H), 2.60 (t, *J*=6.2 Hz, 2H).

Anthracene photodimer (**19**)<sup>20</sup>

A solution of anthracene 100 mg (0.56 mmol) in dry benzene (15 mL) was placed in a round-bottom Pyrex flask which was fitted with a reflux condenser. It was irradiated with a 150-W lamp placed close to flask and the heat from the lamp brought up the solution to gently reflux. After 24 h, the irradiation was stopped and the solution was cooled to room temperature. The colorless crystals that precipitated were isolated via vacuum filtration, washed with a few mL of ice-cold benzene, and dried under vacuum to afford 53 mg (53% yield) of photodimer **19**.

<sup>1</sup>H NMR (CDCl<sub>3</sub>) δ 6.92 (dd, *J*=5.5, 3.2 Hz, 8H), 6.81 (dd, *J*=5.5, 3.2 Hz, 8H), 4.54 (s, 4H).

13-Methyl-10,11-dihydro-9*H*-9,10-[3,4] epipyrroloanthracene-12,14(13*H*,15*H*)-dione (**25**)<sup>21</sup>

Method 1.<sup>22</sup> A solution of anthracene (50 mg, 0.281 mmol) and *N*-methylmaleimide (50 mg, 0.450 mmol) in dichloromethane (1.5 mL) was pressurized at 8 kbar and 90 °C for 3 days. Solvent and unreacted reagents were removed in high vacuo to afford cycloadduct **25** as colorless solid (68 mg, 84%).

Method 2.<sup>23</sup> A solution of anthracene (50 mg, 0.281 mmol) and *N*-methylmaleimide (50 mg, 0.450 mmol) in chlorobenzene (1 mL) was subjected to microwave irradiation at 160 °C for 1 hour.

Solvent and unreacted reagents were removed in high vacuo to afford cycloadduct **25** as colorless solid (61 mg, 75%).

Method 3. A mixture of anthracene (50 mg, 0.281 mmol) and *N*-methylmaleimide (31 mg, 0.281 mmol) was subjected to neat grinding by ball milling (stainless steel 12 mm ball, 30 Hz) for 2 hours. Solid was collected by scraping off the reaction vessel and ball to afford cycloadduct **25** as colorless solid (76 mg, 94%).

$^1\text{H NMR}$  ( $\text{CDCl}_3$ )  $\delta$  7.37 (dd,  $J=5.4, 3.3$  Hz, 2H), 7.26 (dd,  $J=5.4, 3.3$  Hz, 2H), 7.17 (dd,  $J=5.6, 3.2$  Hz, 2H), 7.11 (dd,  $J=5.6, 3.2$  Hz, 2H), 4.78 (s, 2H), 3.22 (s, 2H), 2.58 (s, 3H,  $\text{NCH}_3$ ).

## NMR spectra

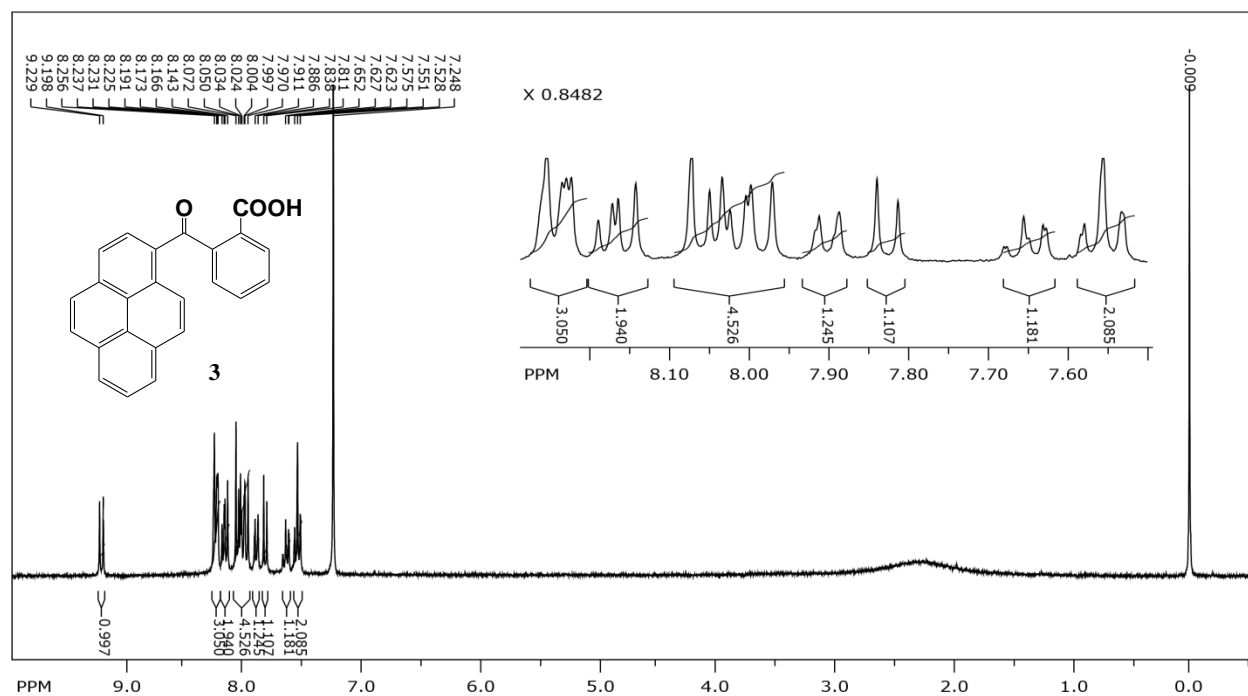

**Figure S1.** <sup>1</sup>H NMR (300 MHz, CDCl<sub>3</sub>) spectrum of **3**

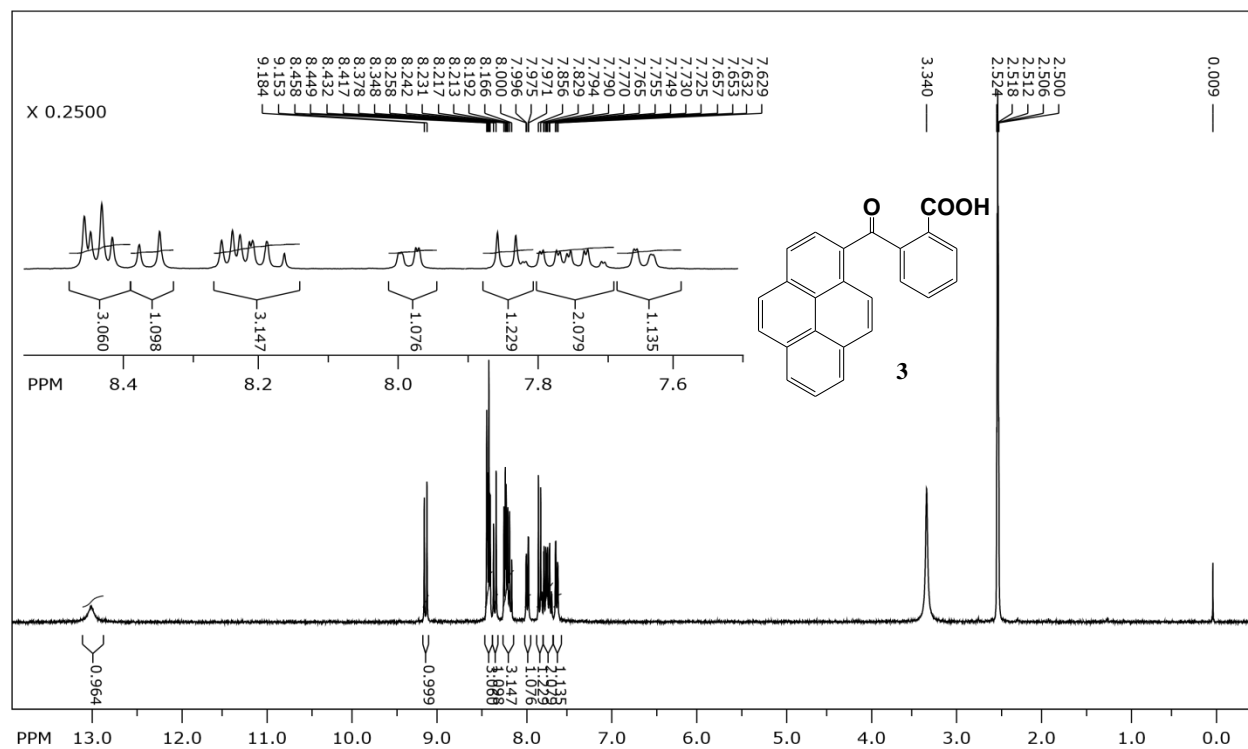

**Figure S2.** <sup>1</sup>H NMR (300 MHz, DMSO-*d*<sub>6</sub>) spectrum of **3**



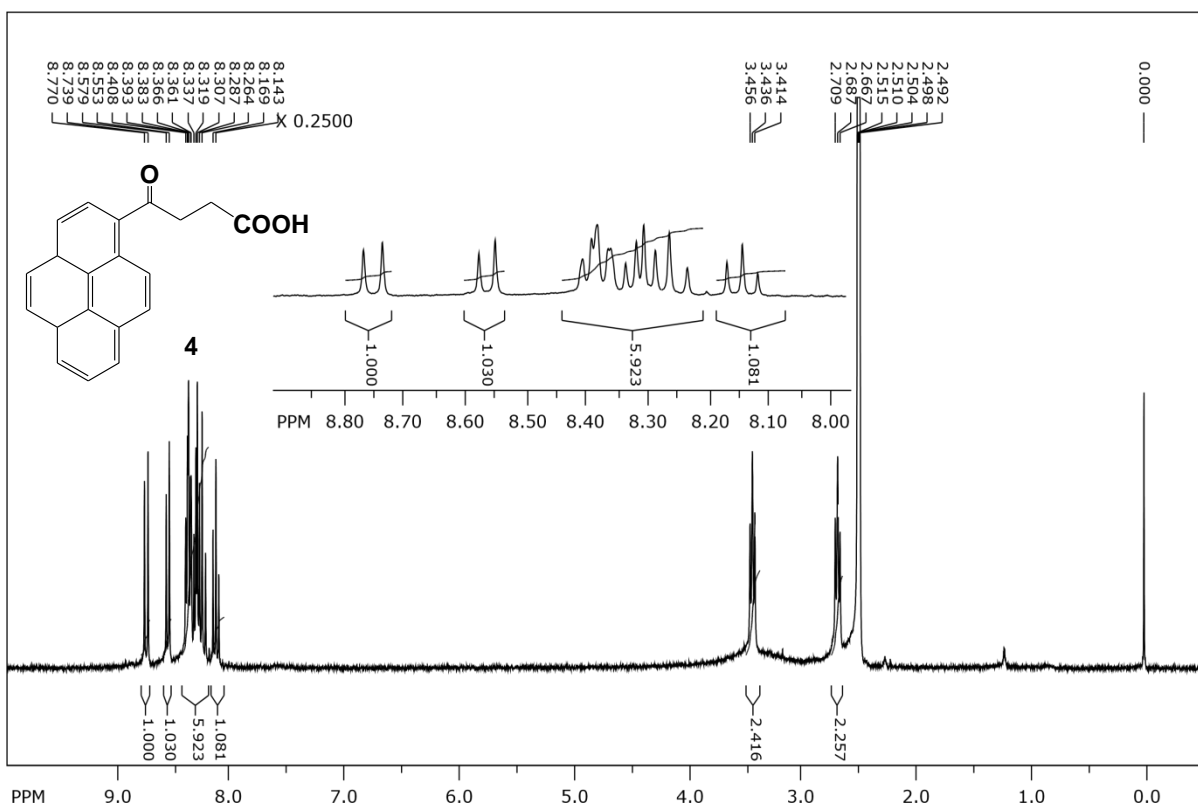

**Figure S3.** <sup>1</sup>H NMR (300 MHz, DMSO-*d*<sub>6</sub>) spectrum of **4**

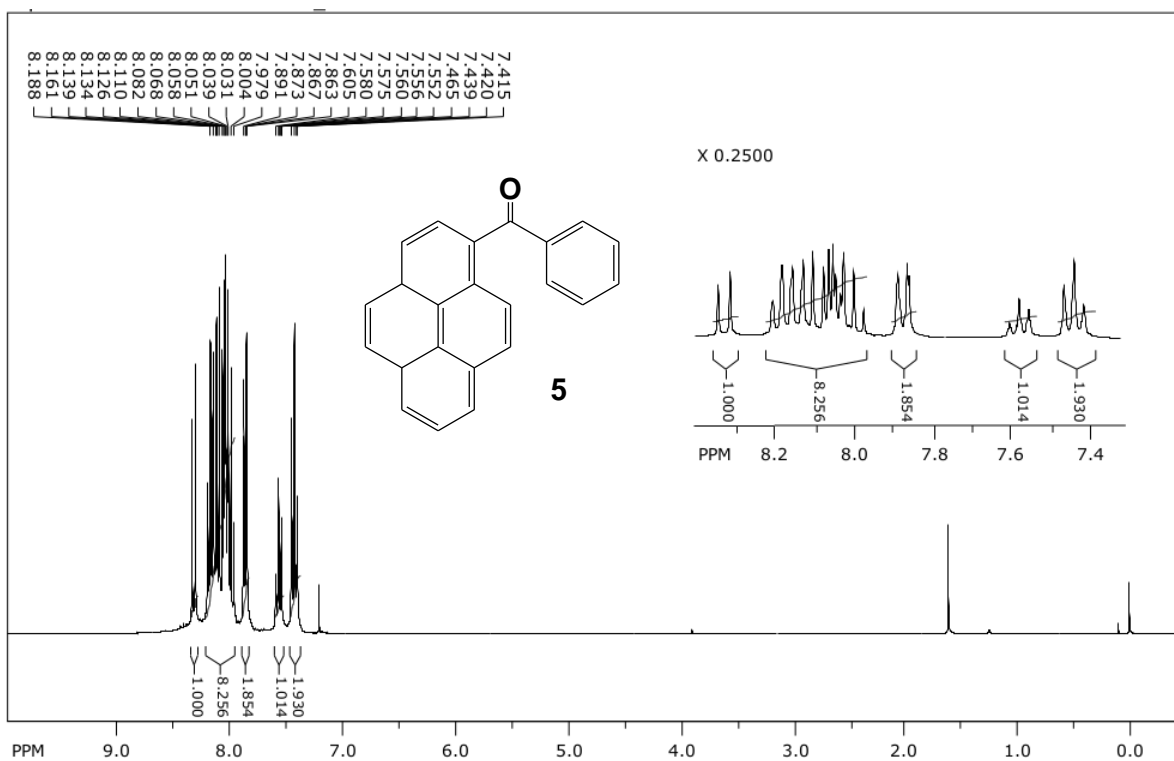

**Figure S4.** <sup>1</sup>H NMR (300 MHz, CDCl<sub>3</sub>) spectrum of **5**

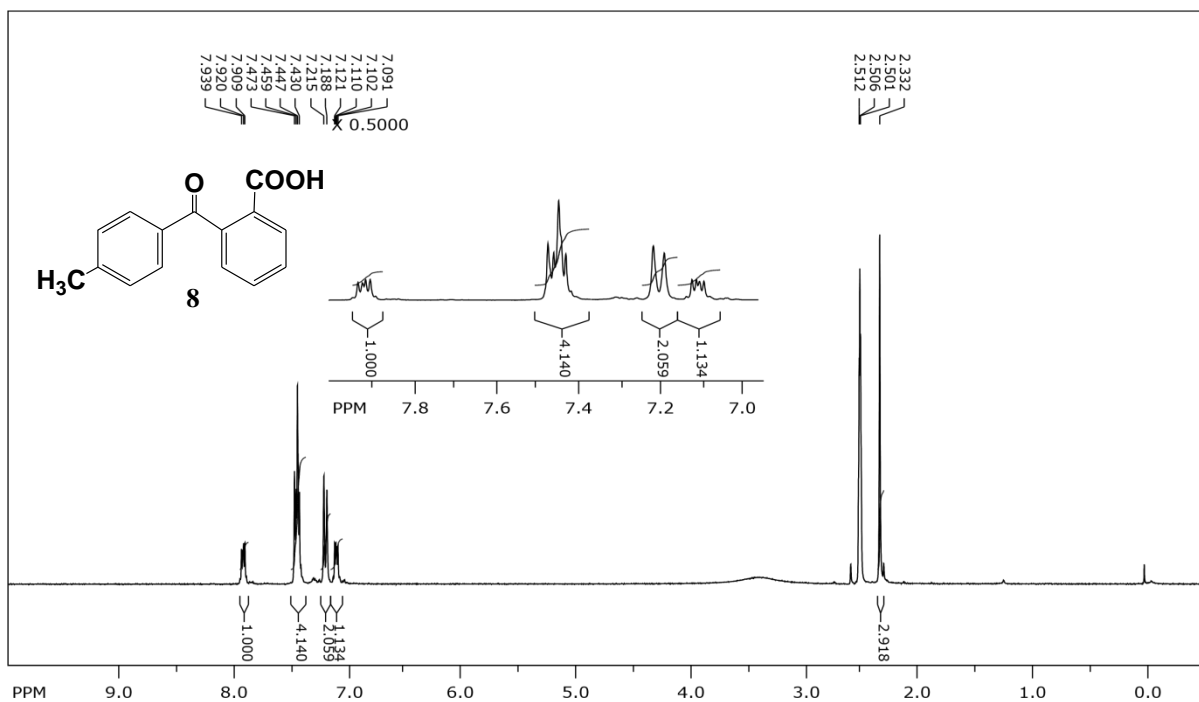

**Figure S5.** <sup>1</sup>H NMR (300 MHz, DMSO-*d*<sub>6</sub>) spectrum of **8**

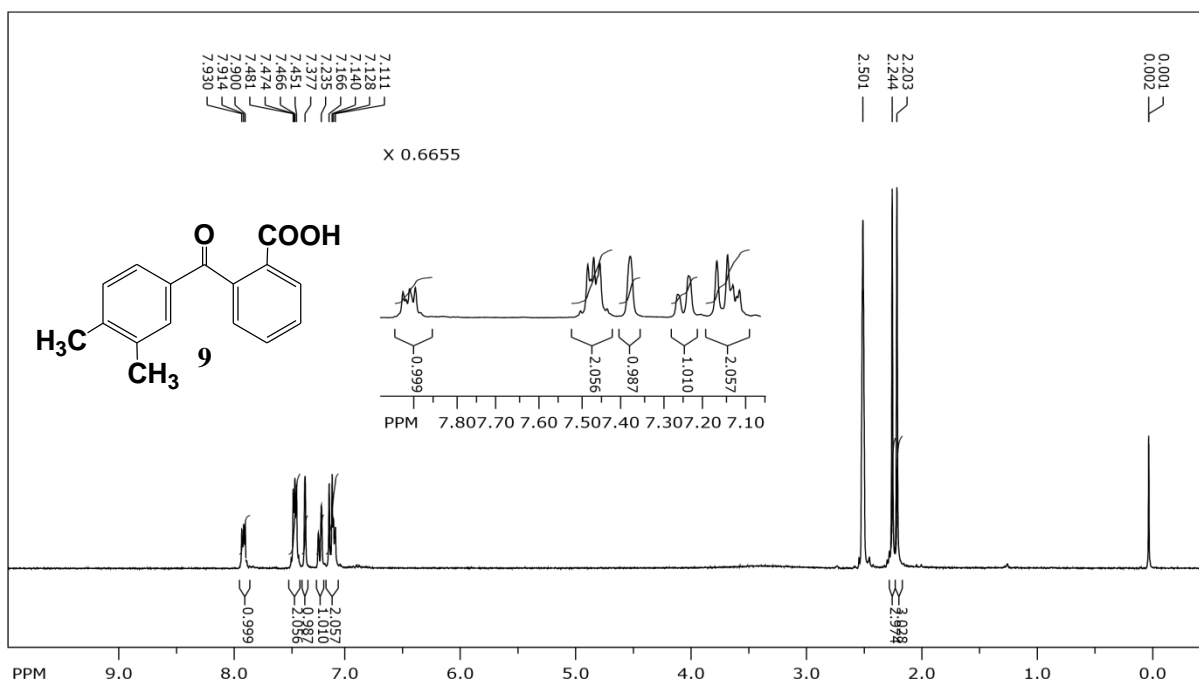

**Figure S6.** <sup>1</sup>H NMR (300 MHz, DMSO-*d*<sub>6</sub>) spectrum of **9**

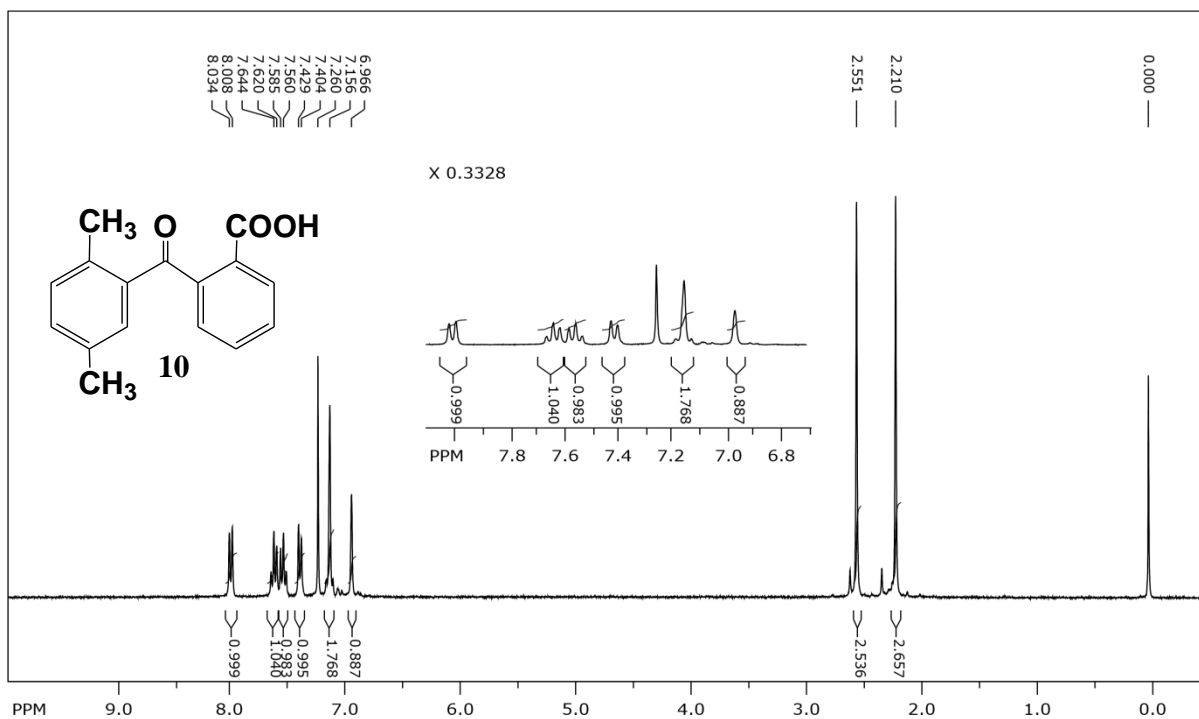

Figure S7. <sup>1</sup>H NMR (300 MHz, CDCl<sub>3</sub>) spectrum of **10**

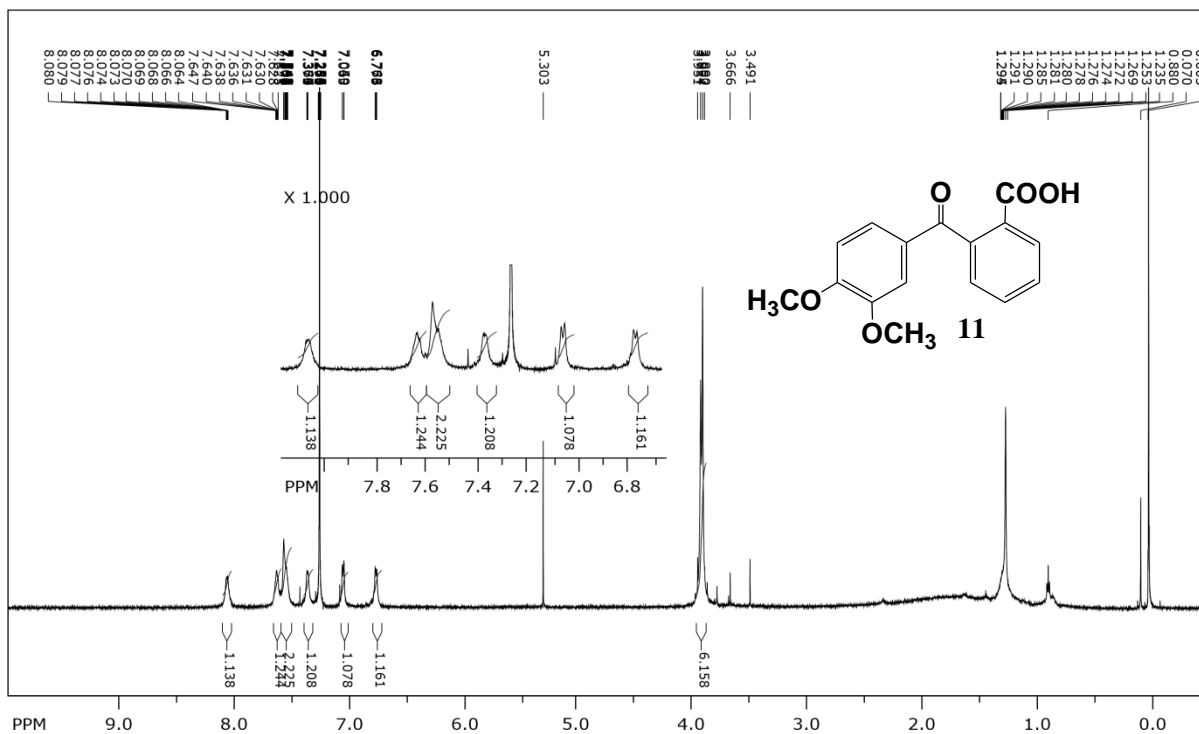

Figure S8. <sup>1</sup>H NMR (300 MHz, CDCl<sub>3</sub>) spectrum of **11**

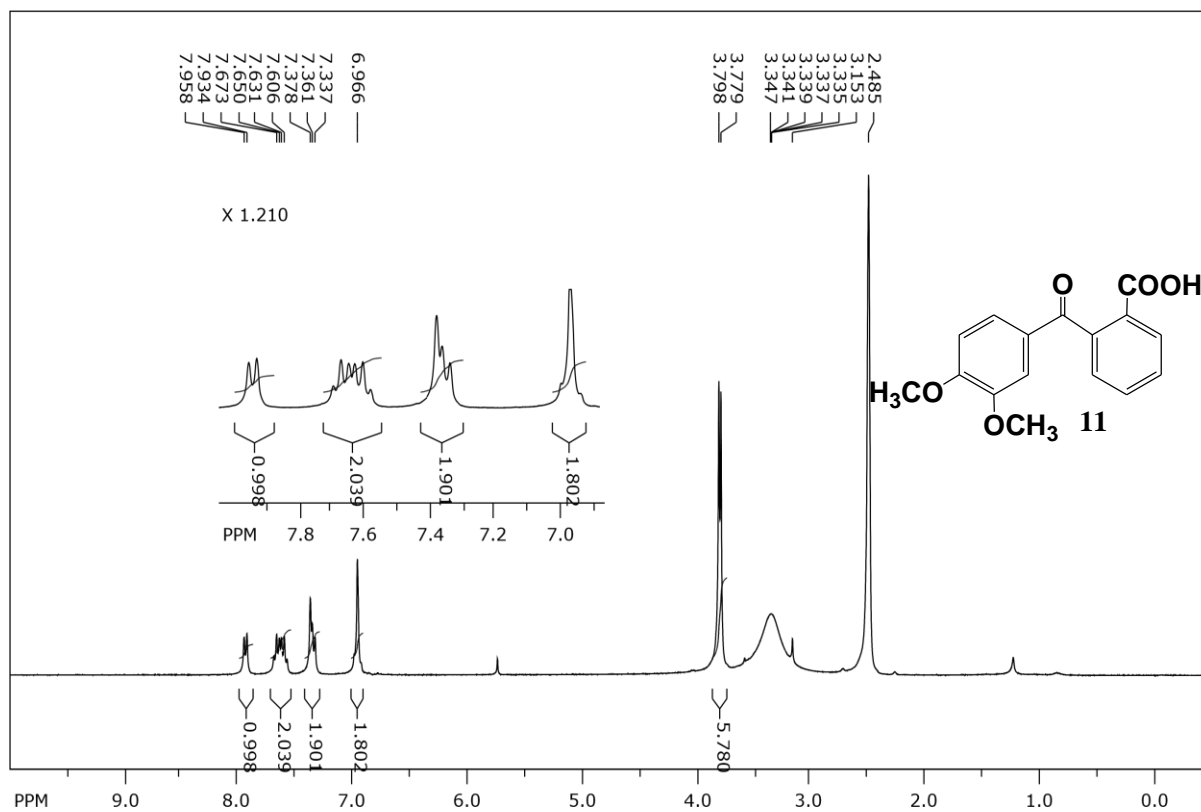

**Figure S9.** <sup>1</sup>H NMR (300 MHz, DMSO-*d*<sub>6</sub>) spectrum of **11**

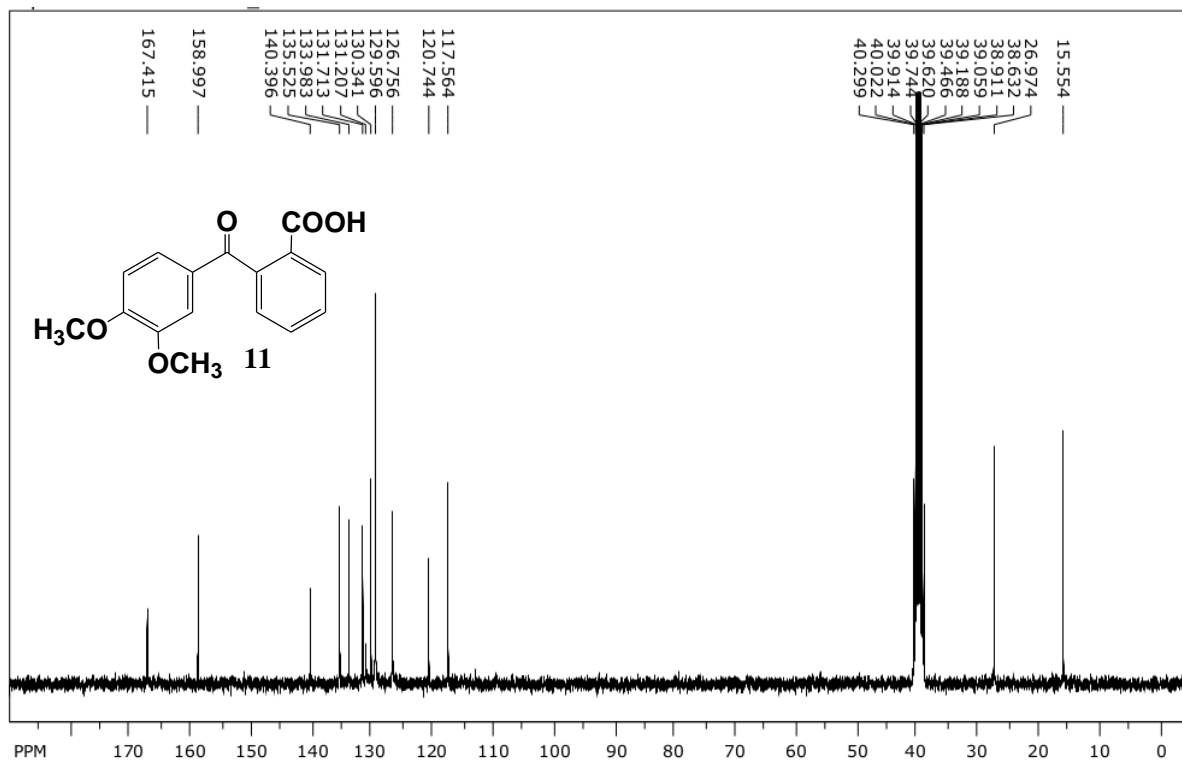

**Figure S10.** <sup>13</sup>C NMR (300 MHz, DMSO-*d*<sub>6</sub>) spectrum of **11**

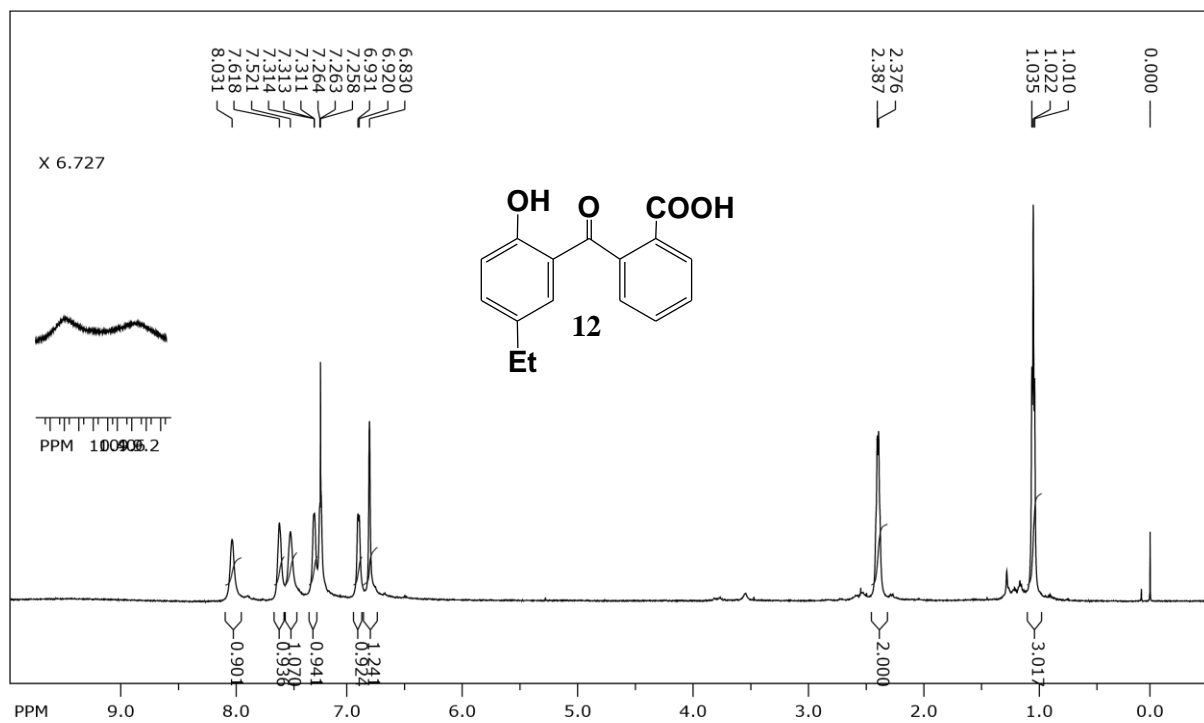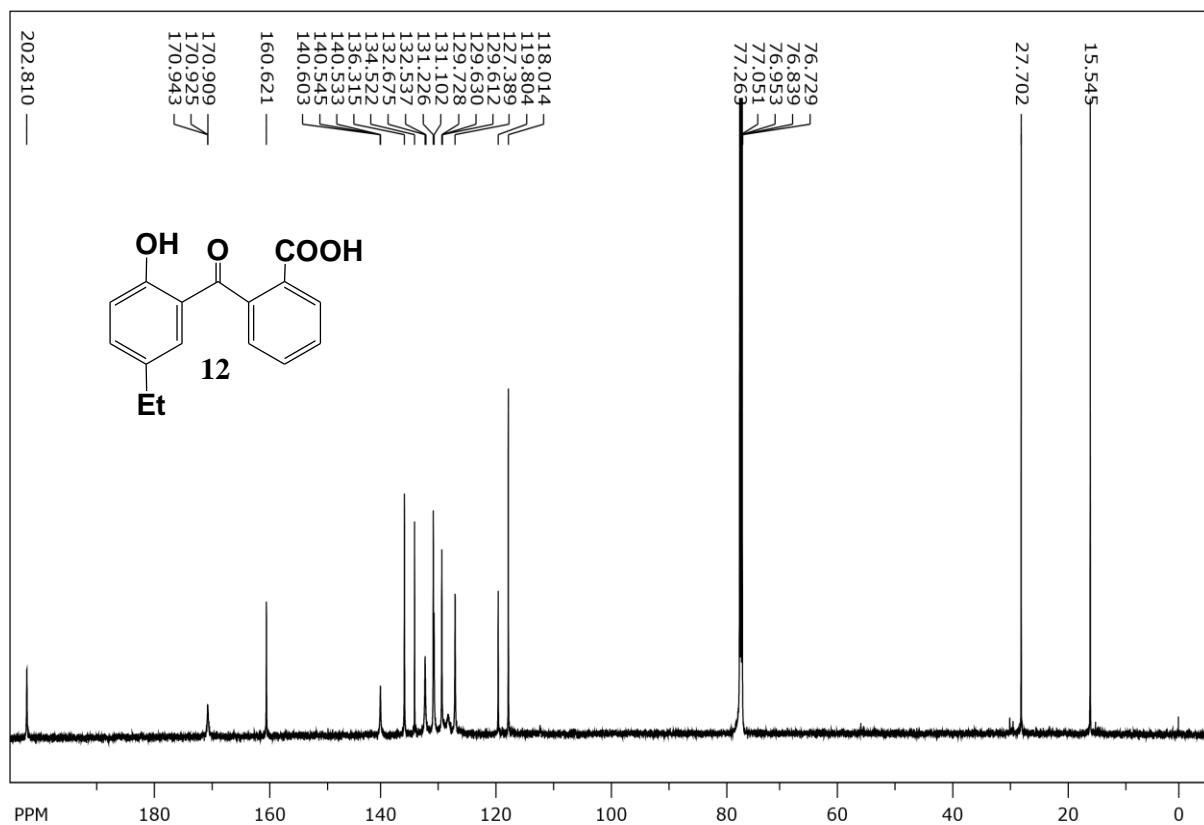

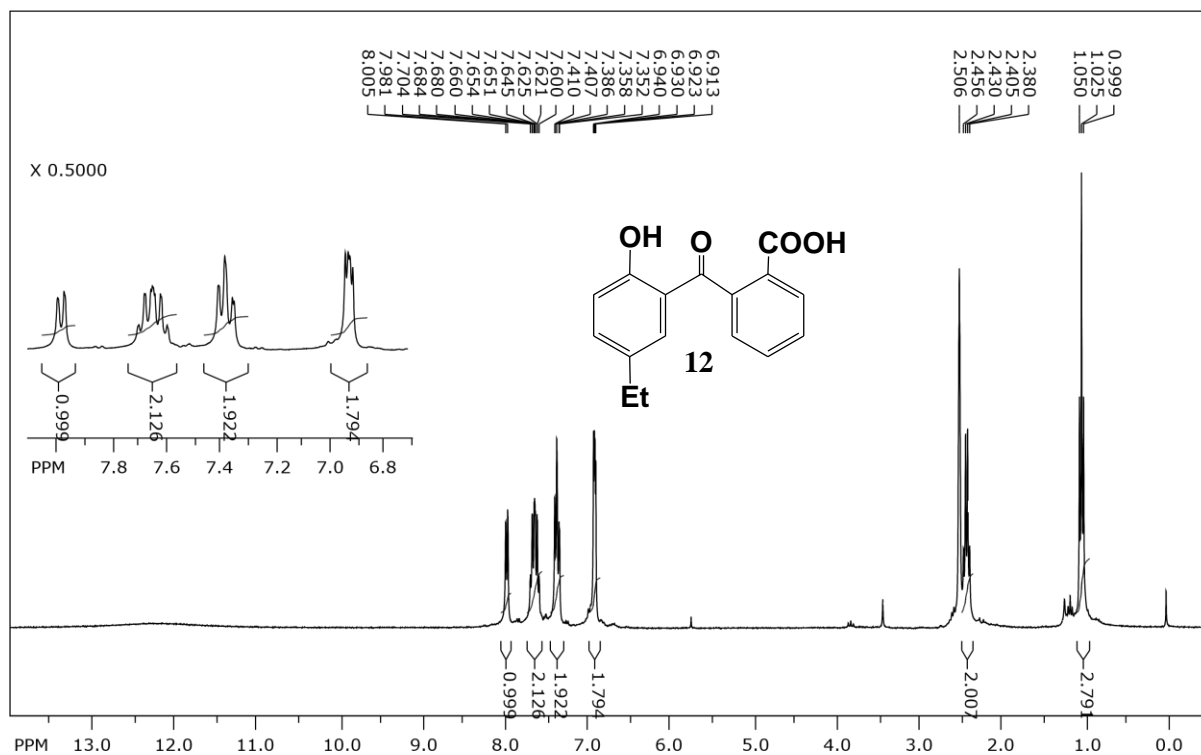

Figure S13. <sup>1</sup>H NMR (300 MHz, DMSO-*d*<sub>6</sub>) spectrum of **12**

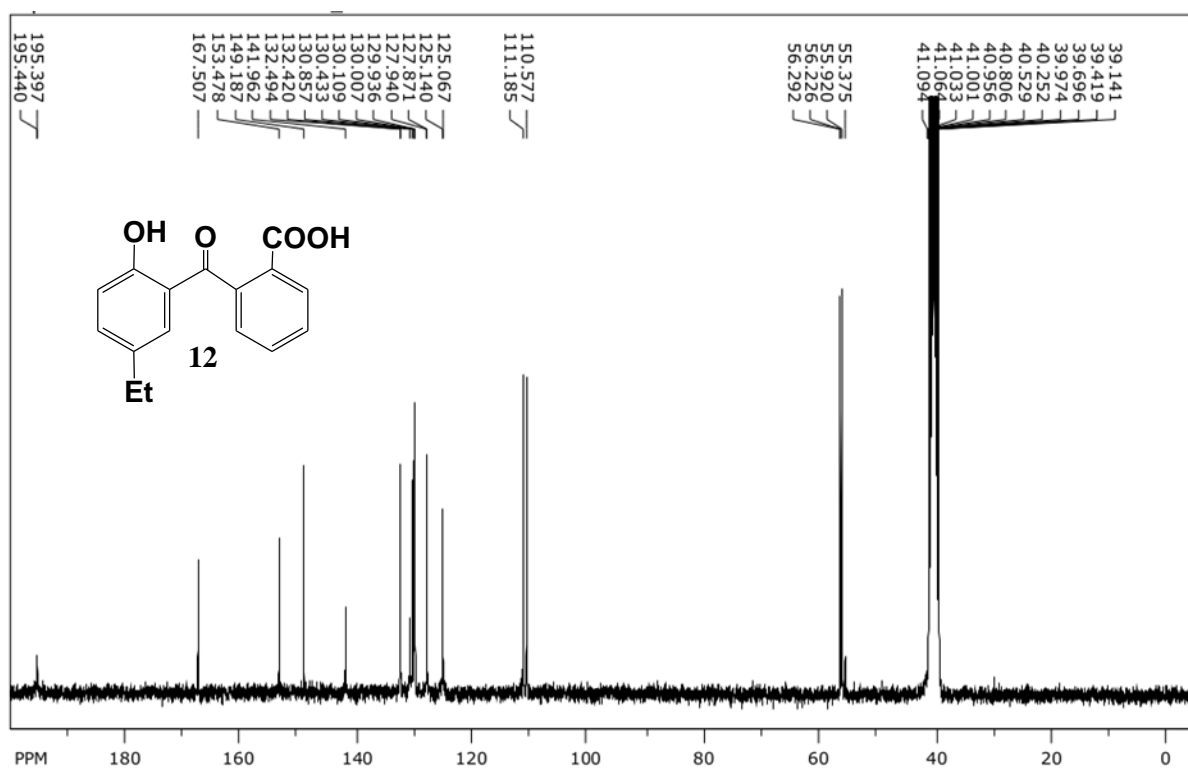

Figure S14. <sup>13</sup>C NMR (300 MHz, DMSO-*d*<sub>6</sub>) spectrum of **12**

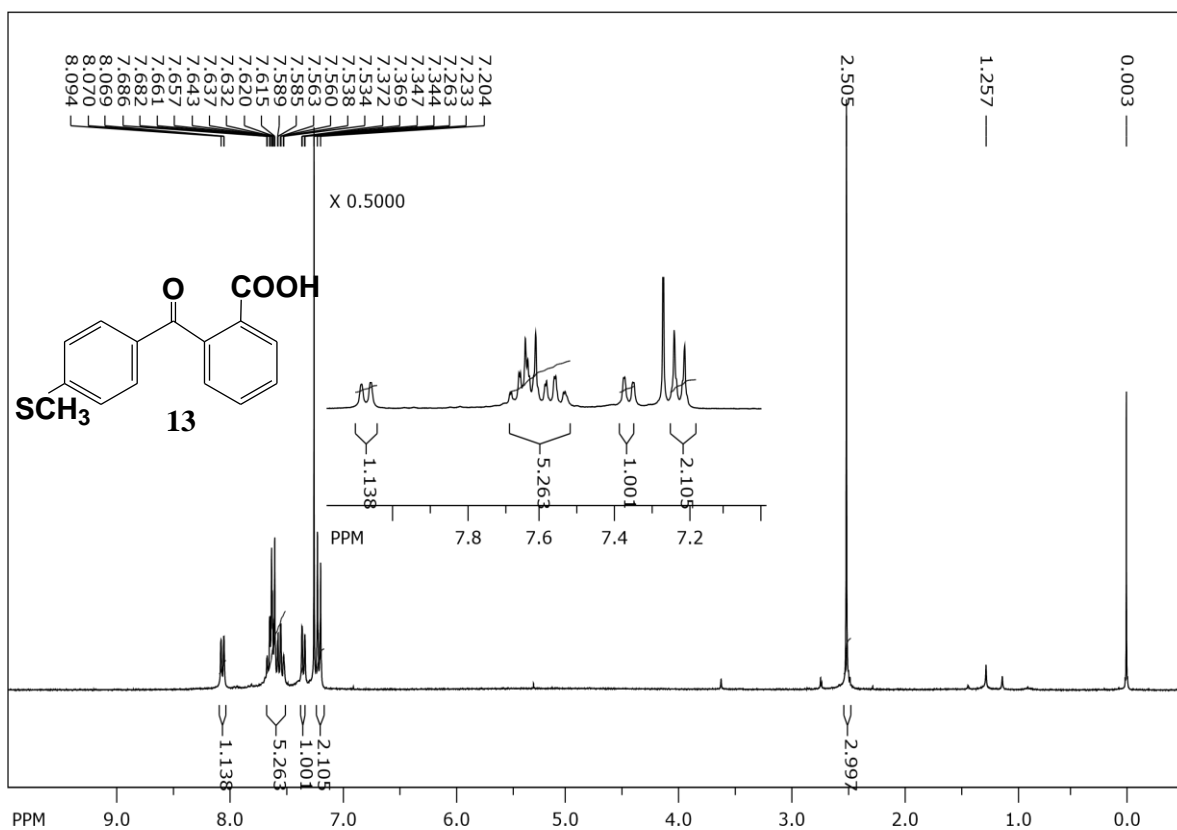

Figure S15. <sup>1</sup>H NMR (300 MHz, CDCl<sub>3</sub>) spectrum of **13**

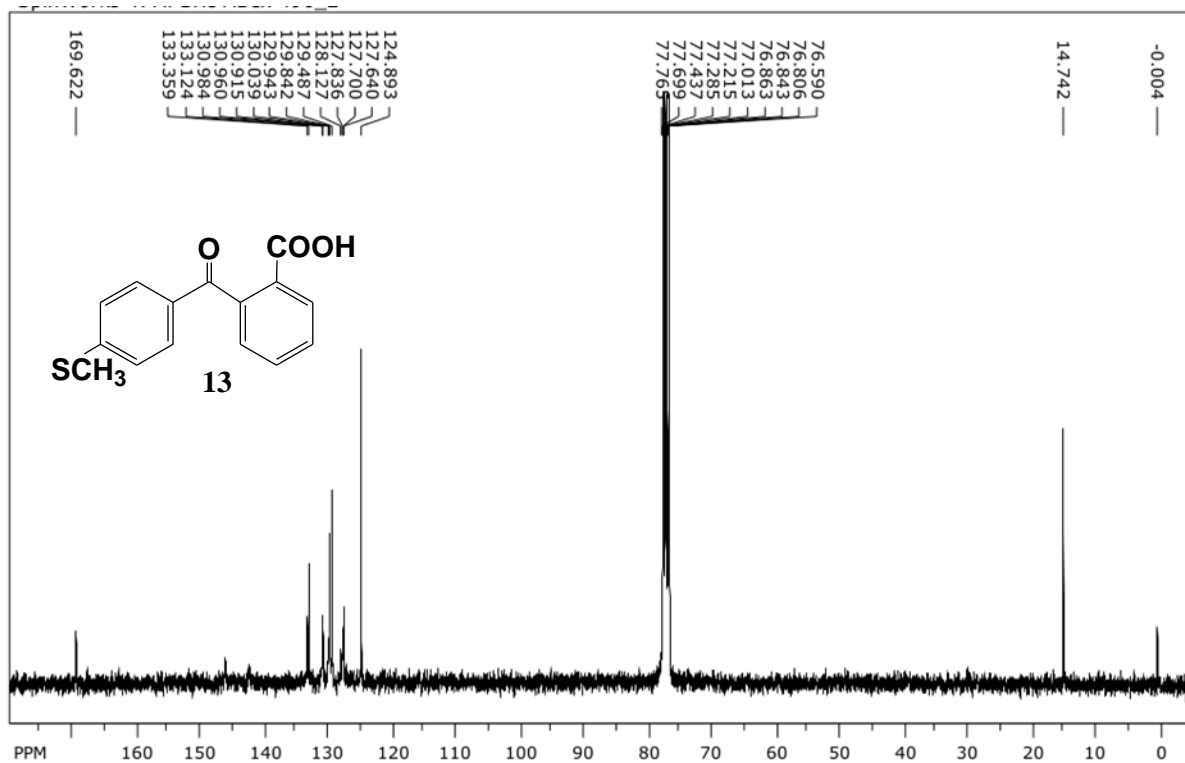

Figure S16. <sup>13</sup>C NMR (300 MHz, CDCl<sub>3</sub>) spectrum of **13**

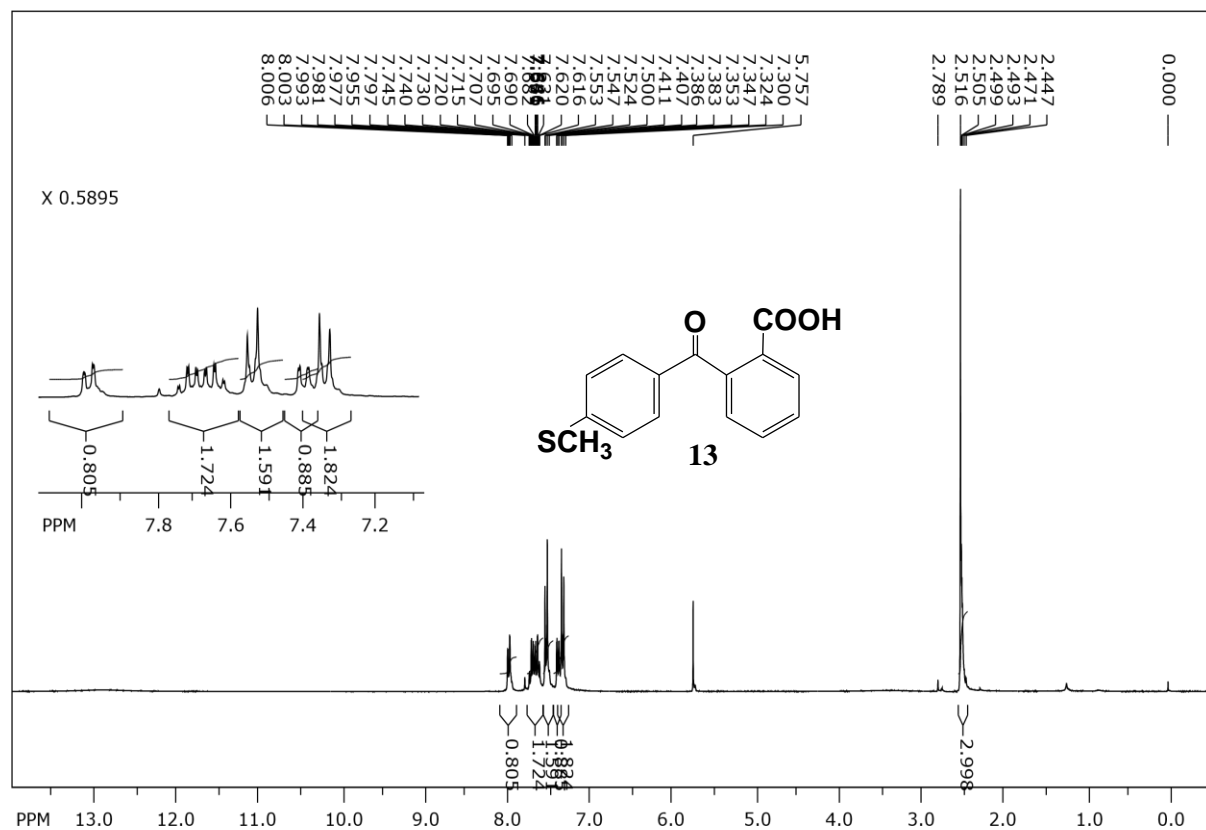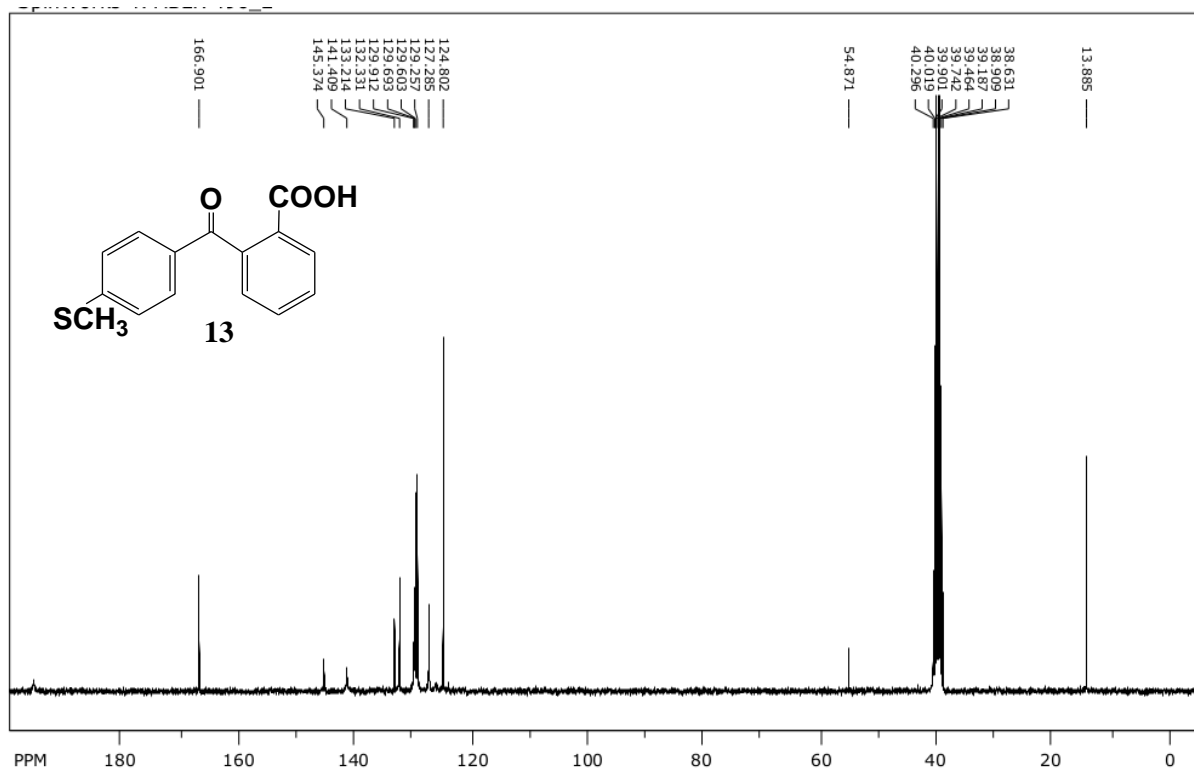



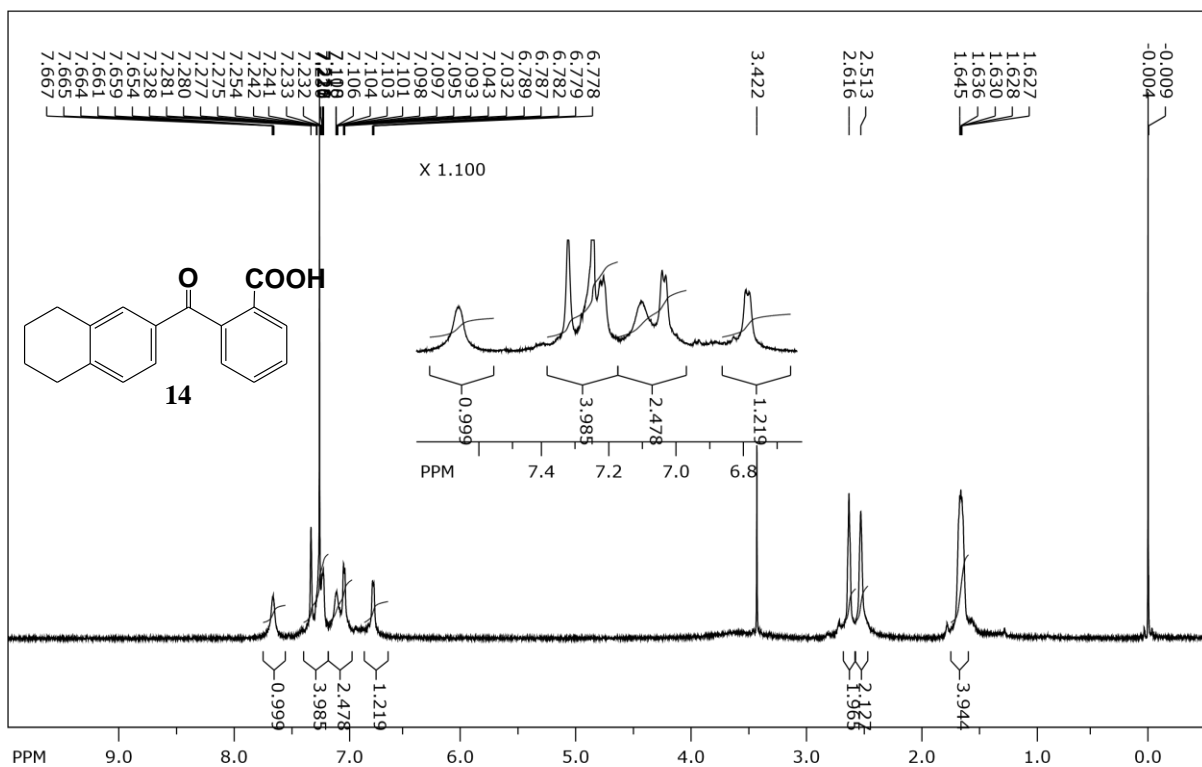

**Figure S19.**  $^1\text{H}$  NMR (300 MHz,  $\text{CDCl}_3$ ) spectrum of **14**

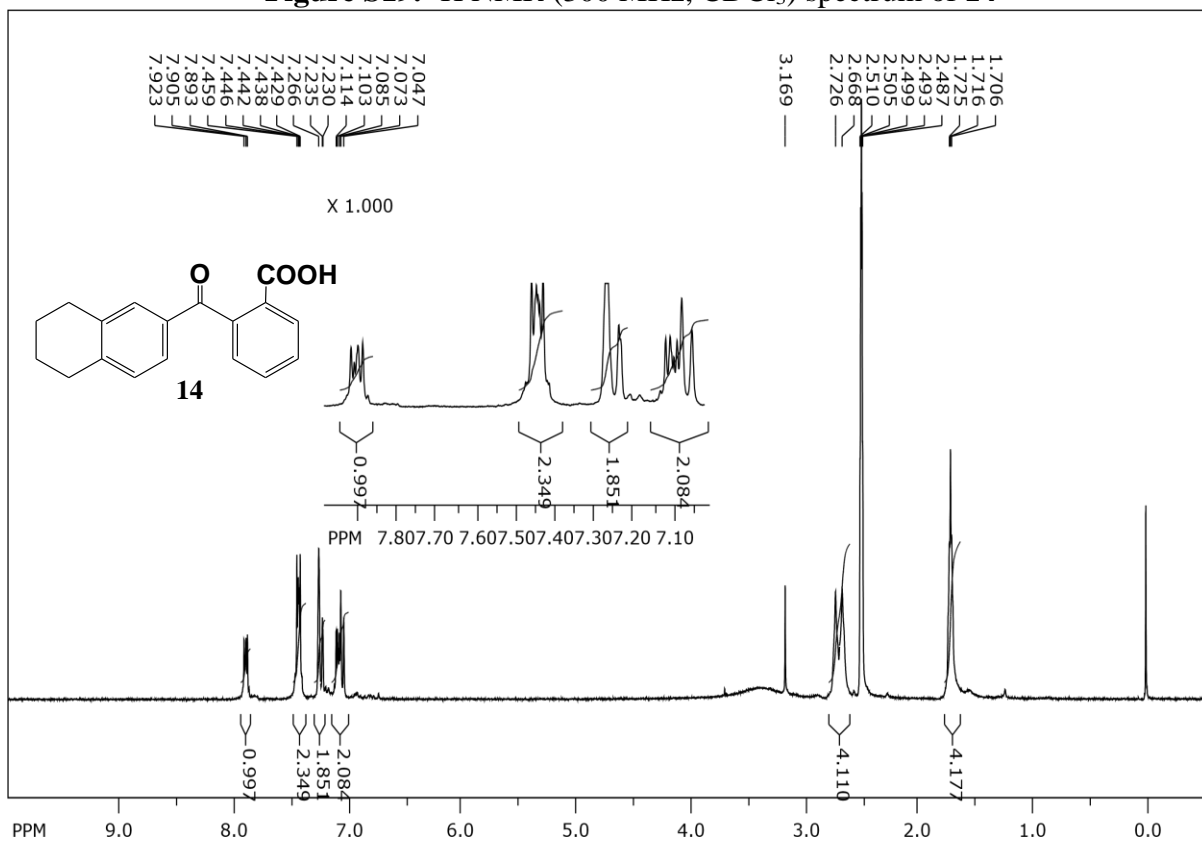

**Figure S20.**  $^1\text{H}$  NMR (300 MHz,  $\text{DMSO}-d_6$ ) spectrum of **14**

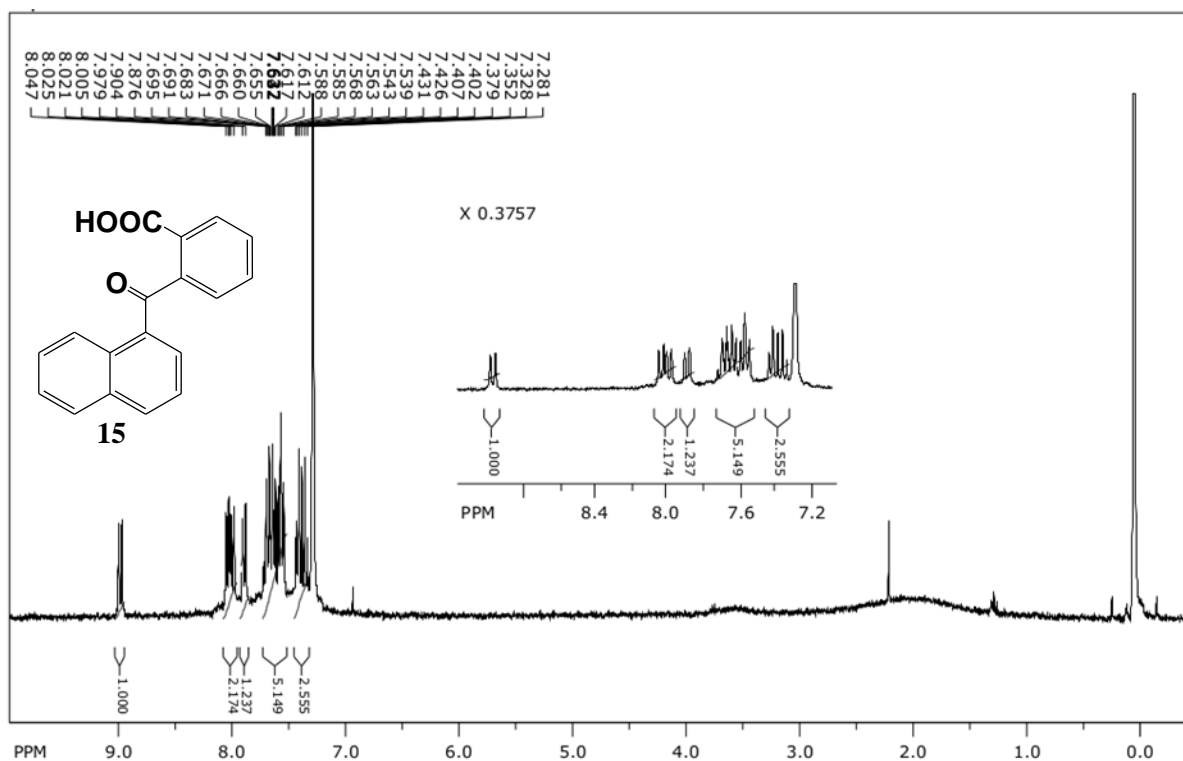

**Figure S21.**  $^1\text{H}$  NMR (300 MHz,  $\text{CDCl}_3$ ) spectrum of **15**

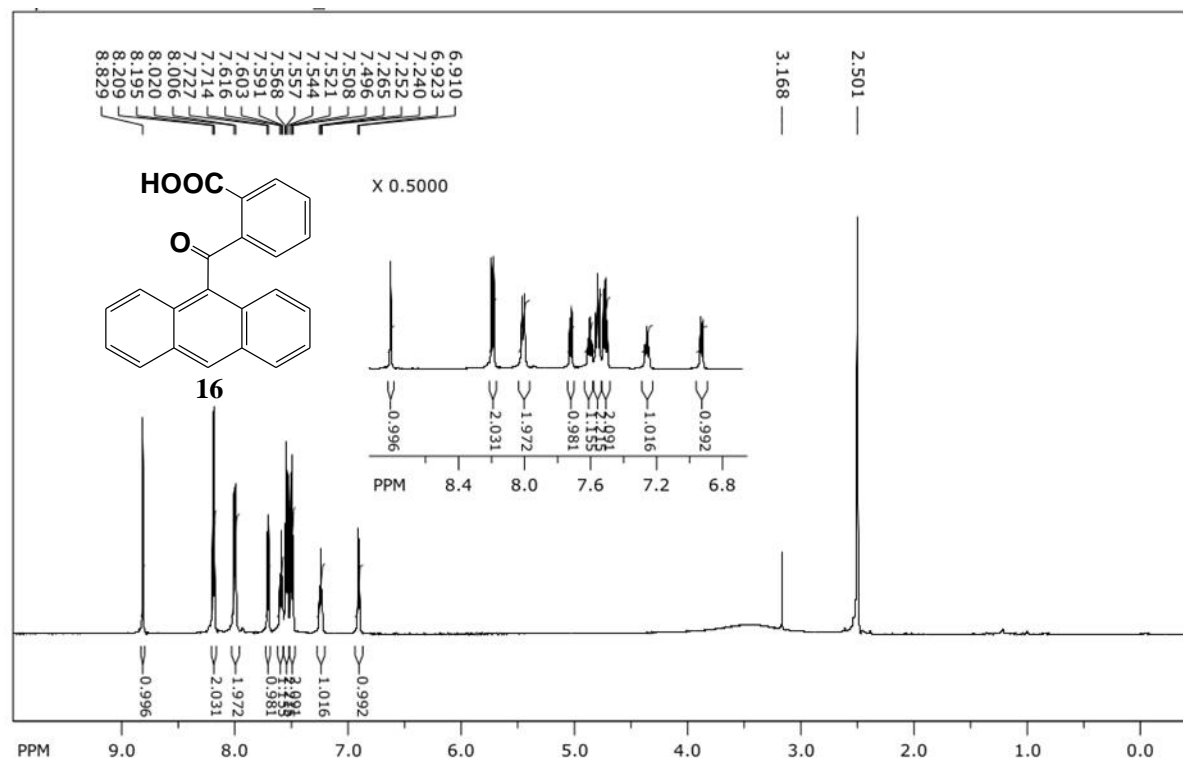

**Figure S22.**  $^1\text{H}$  NMR (300 MHz,  $\text{DMSO}-d_6$ ) spectrum of **16**

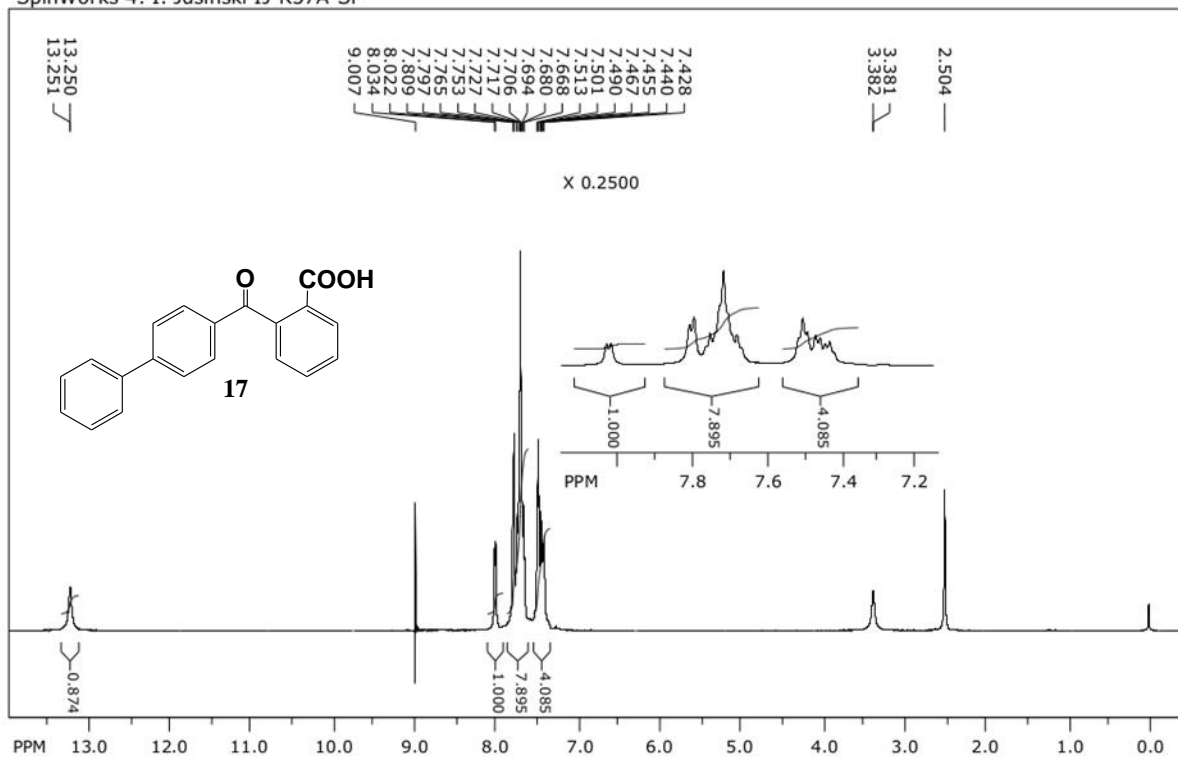

**Figure S23.**  $^1\text{H NMR}$  (300 MHz,  $\text{DMSO-}d_6$ ) spectrum of **17**

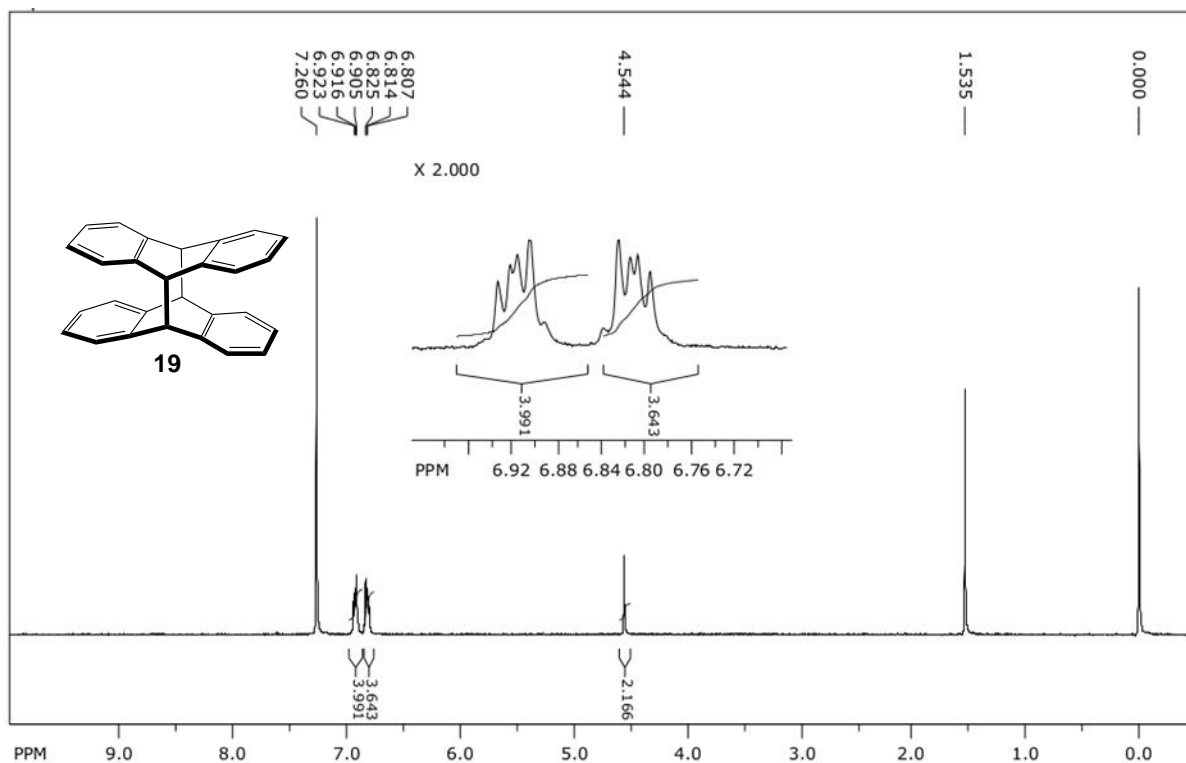

**Figure S24.**  $^1\text{H NMR}$  (300 MHz,  $\text{CDCl}_3$ ) spectrum of **19**

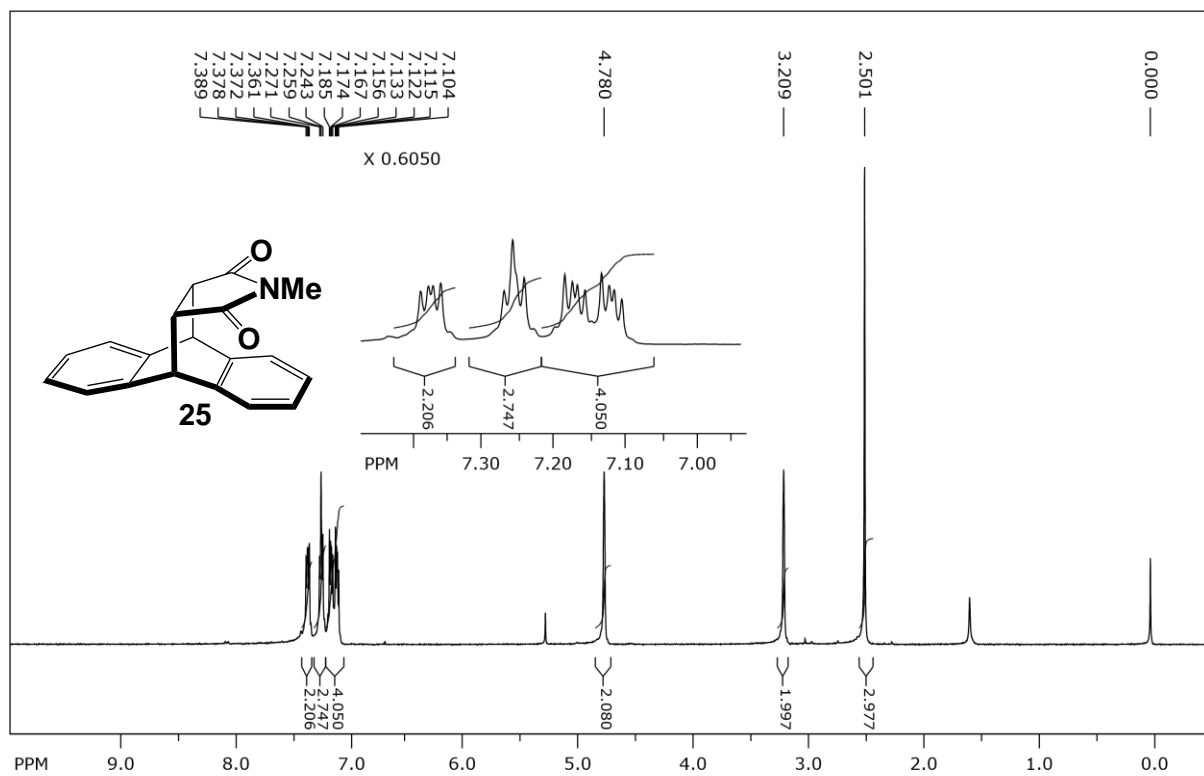

**Figure S25.** <sup>1</sup>H NMR (300 MHz, CDCl<sub>3</sub>) spectrum of **25**

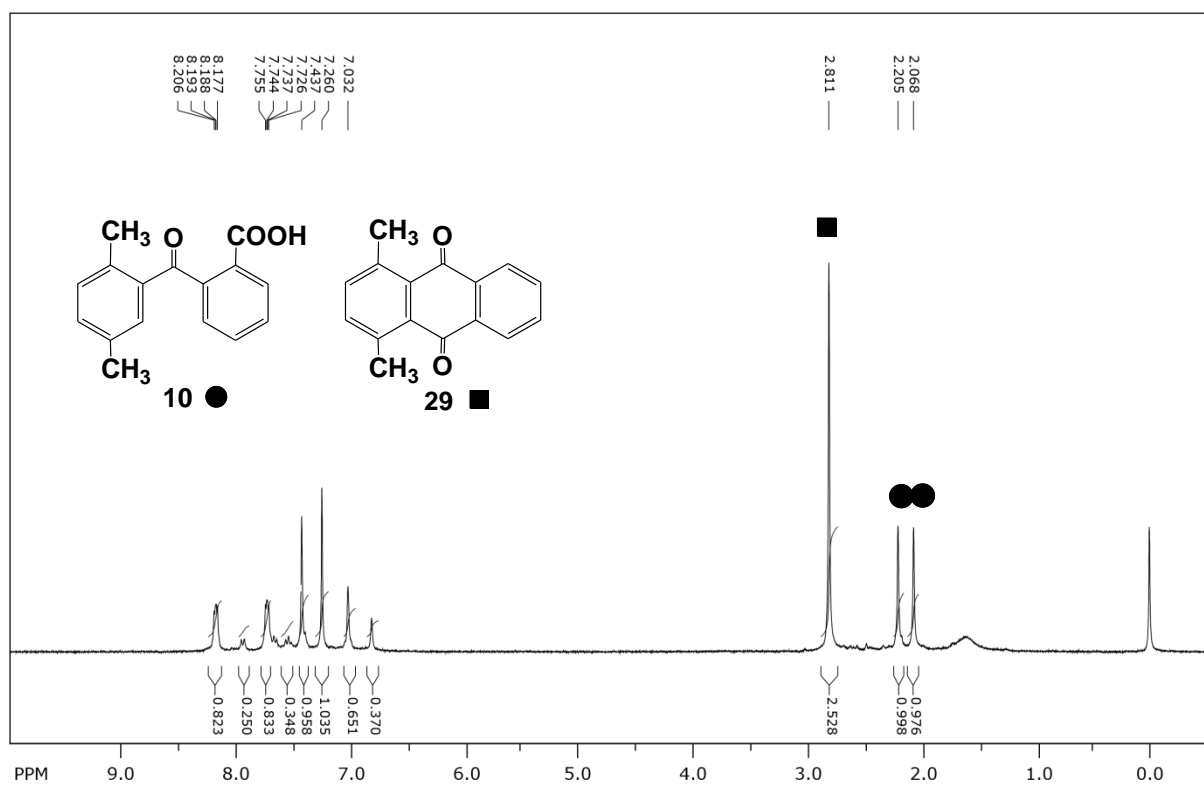

**Figure S26.** <sup>1</sup>H NMR (300 MHz, CDCl<sub>3</sub>) spectrum of mixture of **10** and **29**

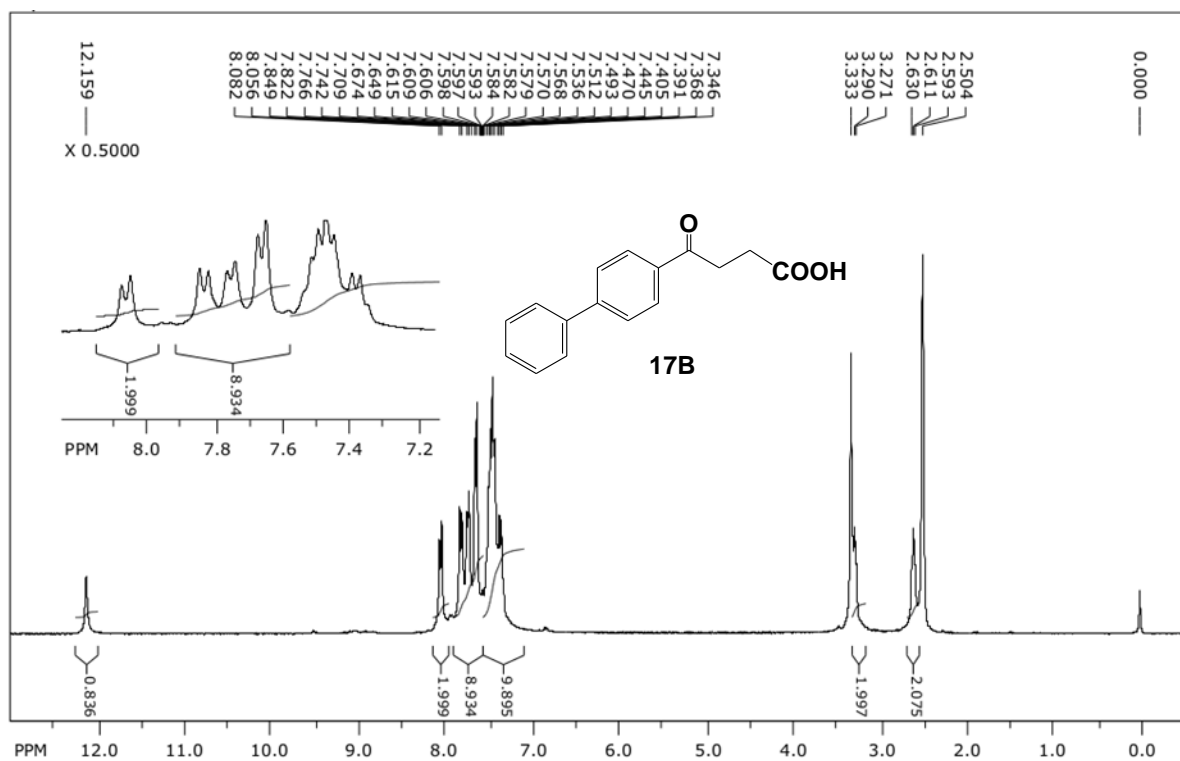

**Figure S27.** <sup>1</sup>H NMR (300 MHz, DMSO-*d*<sub>6</sub>) spectrum of **17B**

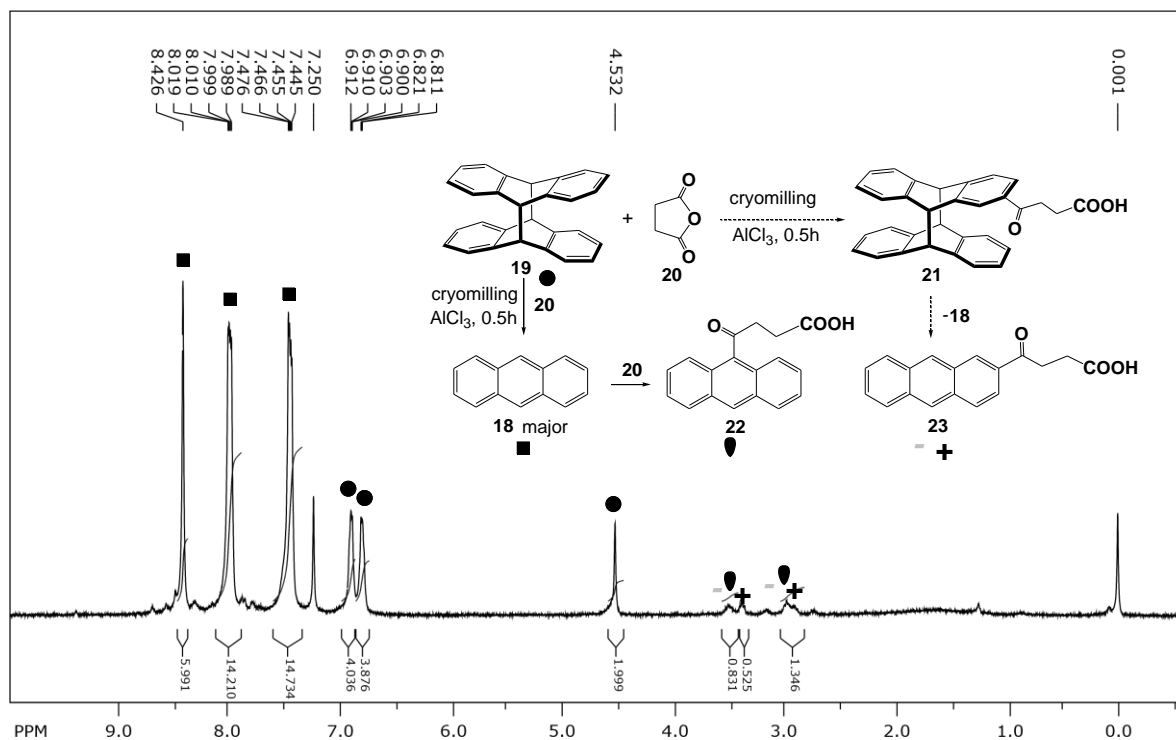

**Figure S28.** <sup>1</sup>H NMR (300 MHz, CDCl<sub>3</sub>) spectrum of cryomilling mixture of **18-23**

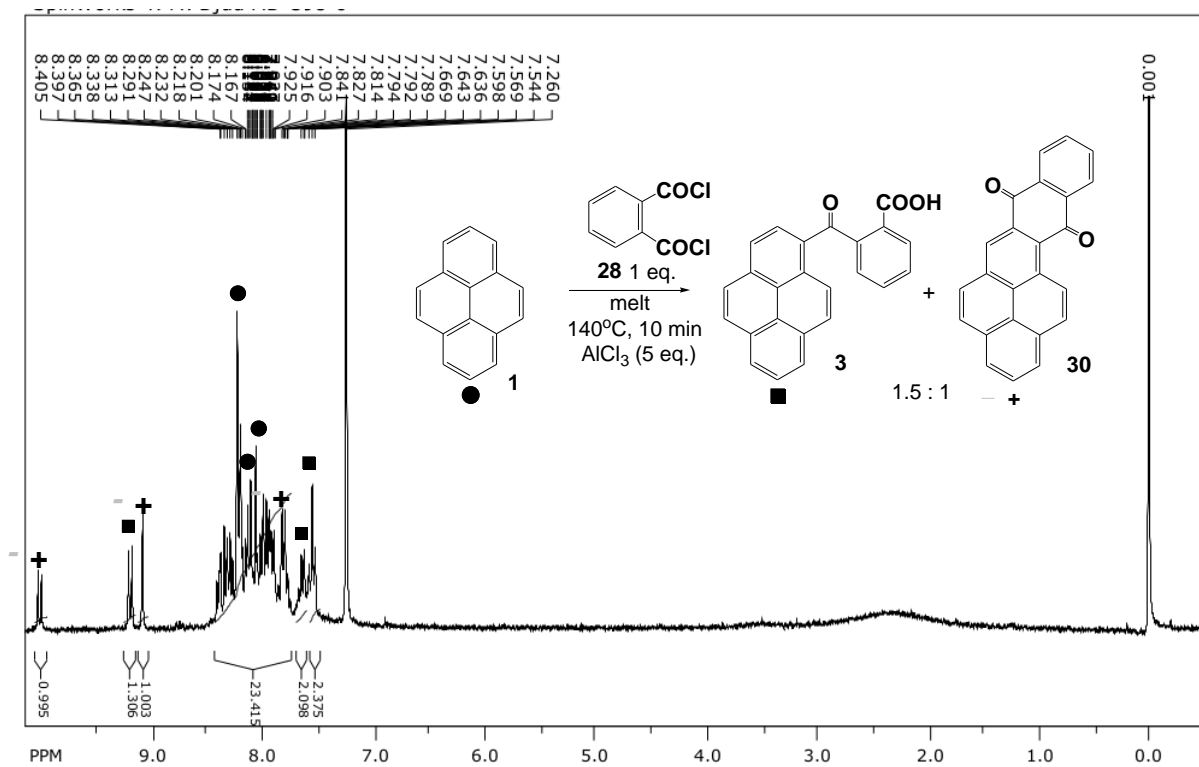

Figure S29. <sup>1</sup>H NMR (300 MHz, CDCl<sub>3</sub>) spectrum of melt reaction of pyrene **1** with **28**

### IR spectra

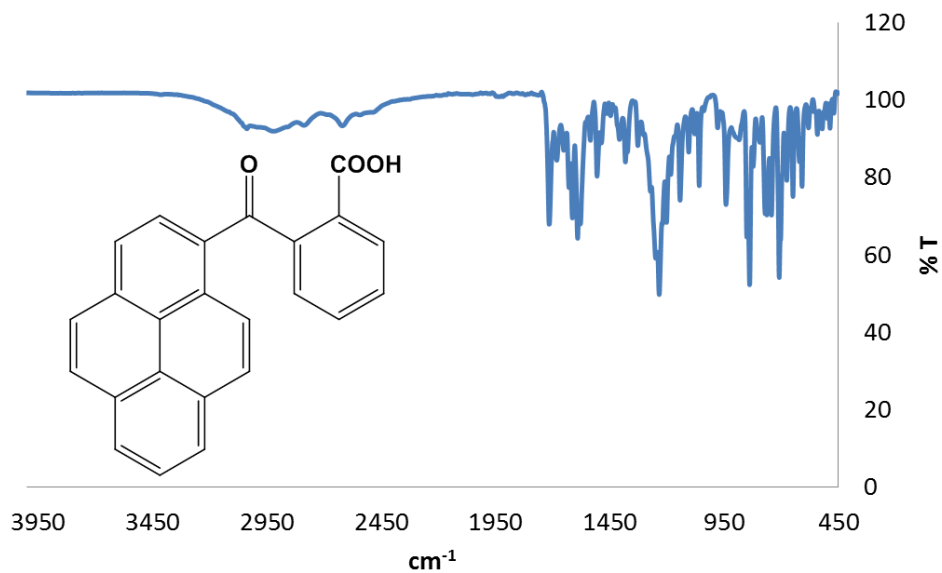

Figure S30. IR-ATR spectrum of **3**

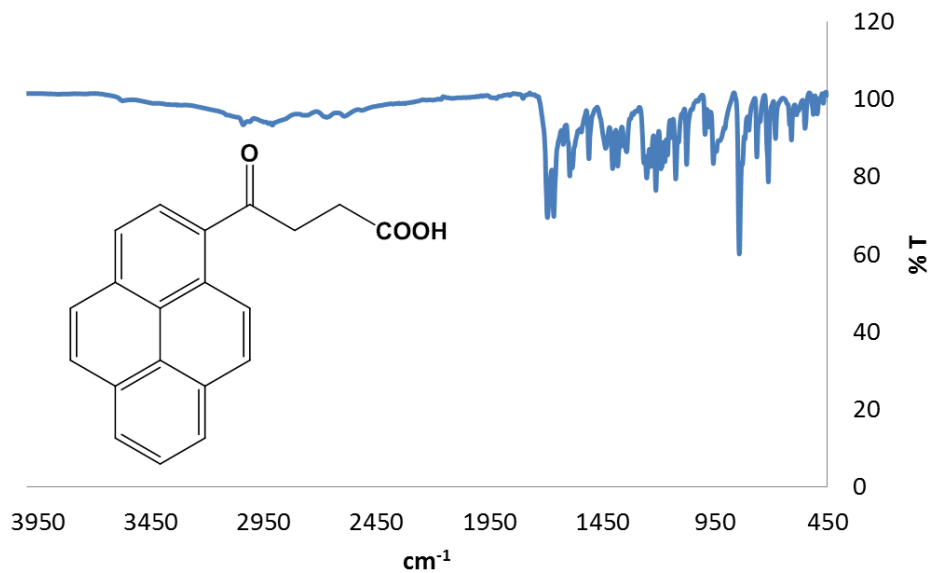

**Figure S31.** IR-ATR spectrum of **4**

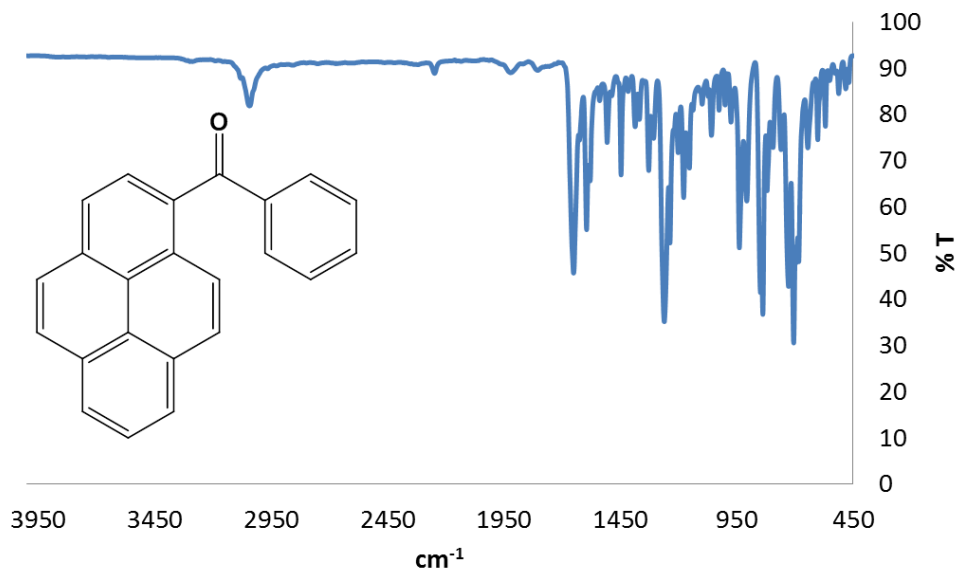

**Figure S32.** IR-ATR spectrum of **5**

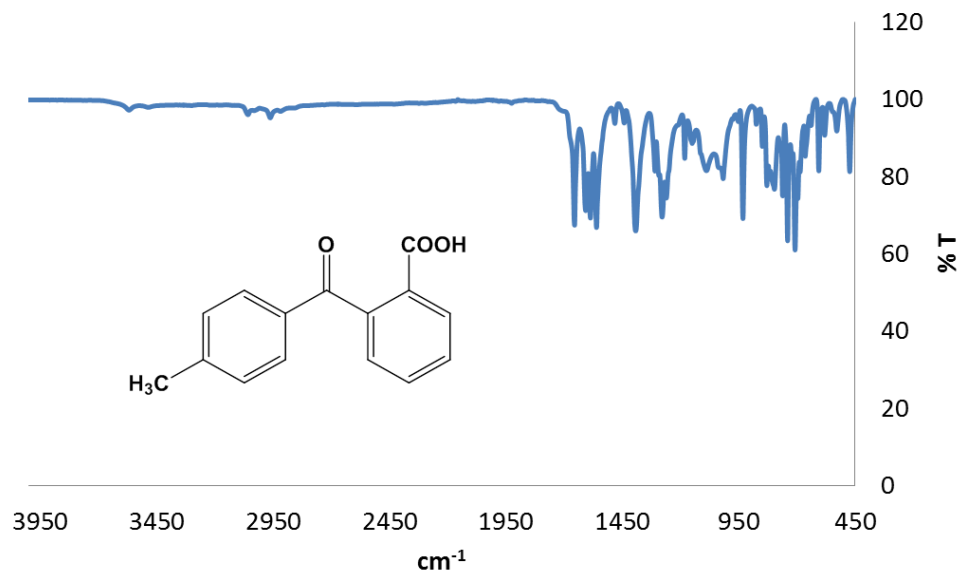

**Figure S33.** IR-ATR spectrum of **8**

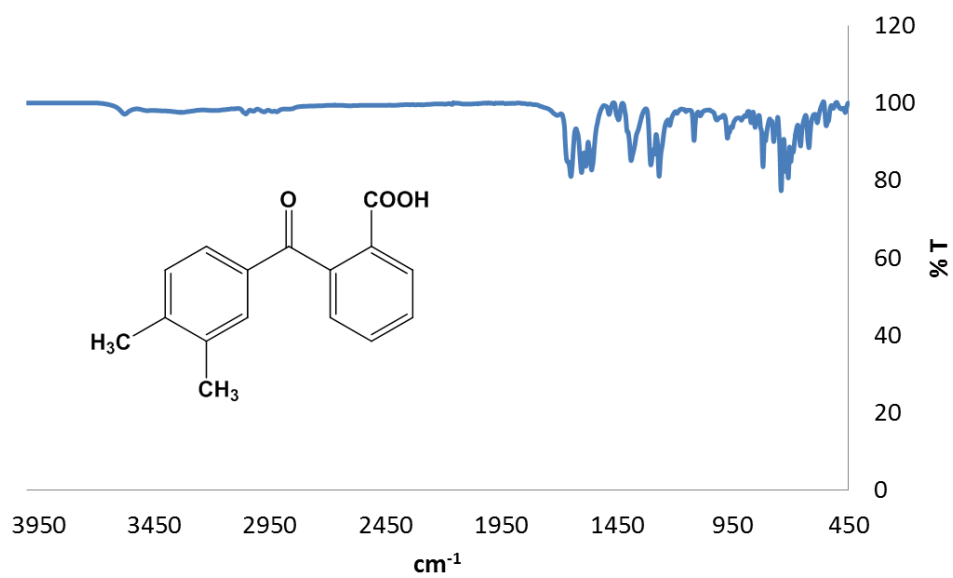

**Figure S34.** IR-ATR spectrum of **9**



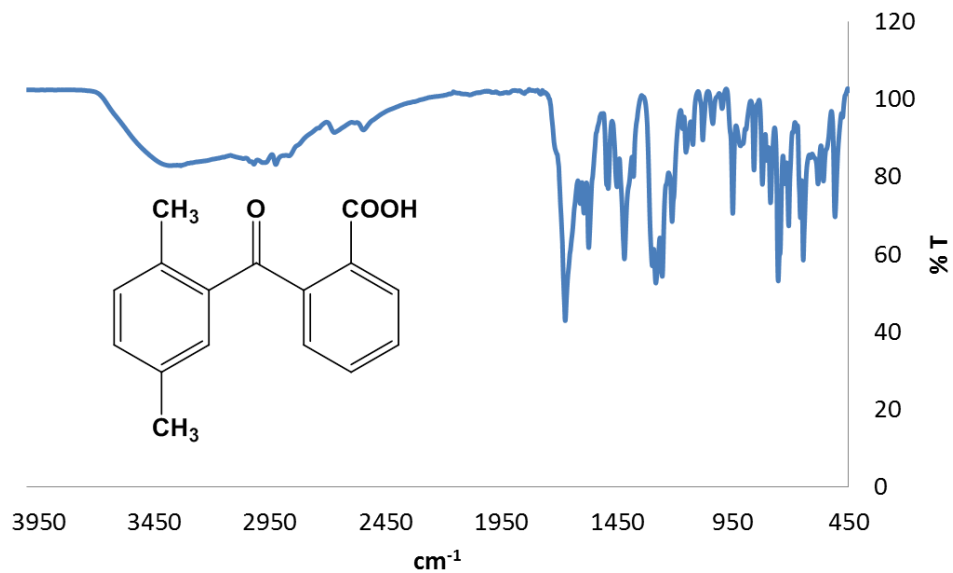

**Figure S35.** IR-ATR spectrum of **10**

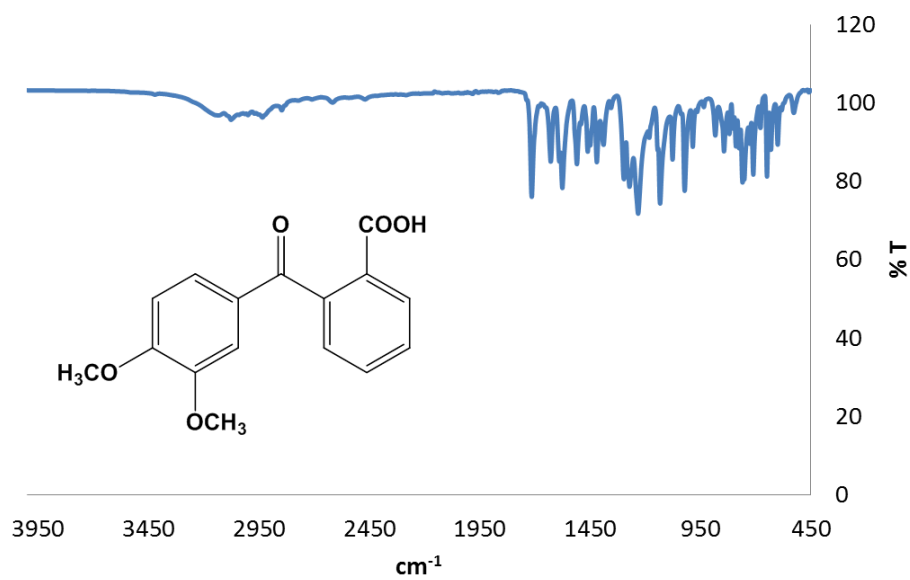

**Figure S36.** IR-ATR spectrum of **11**

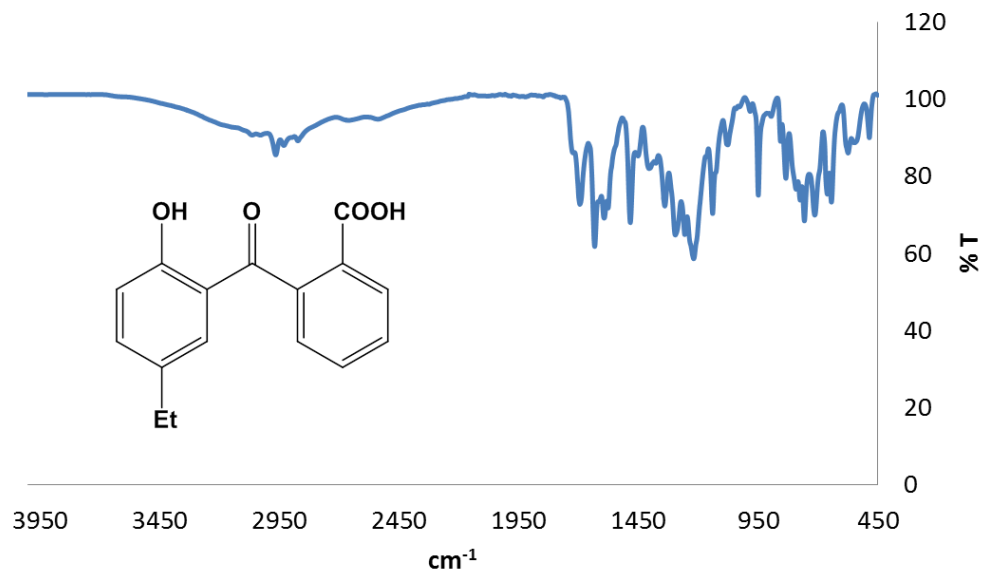

**Figure S37.** IR-ATR spectrum of **12**

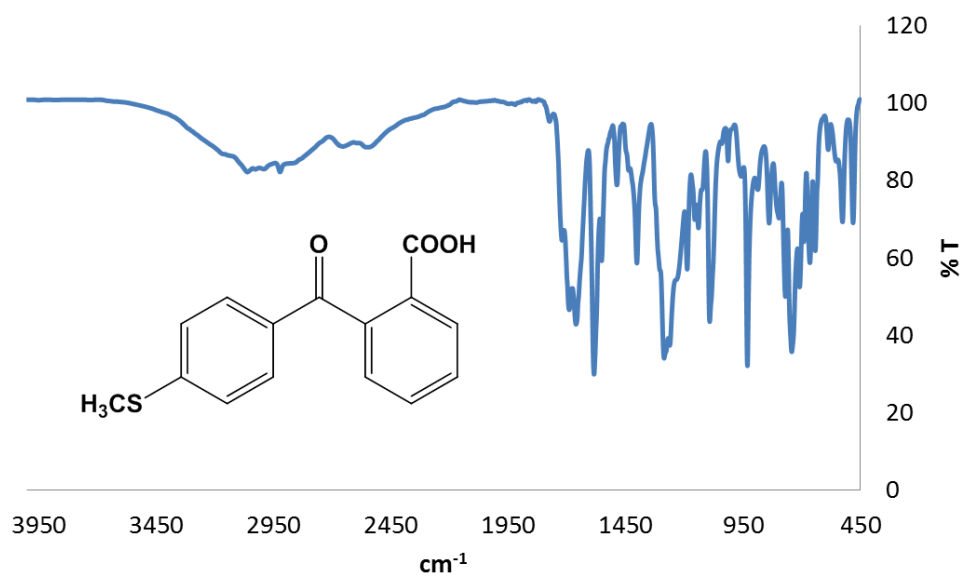

**Figure S38.** IR-ATR spectrum of **13**

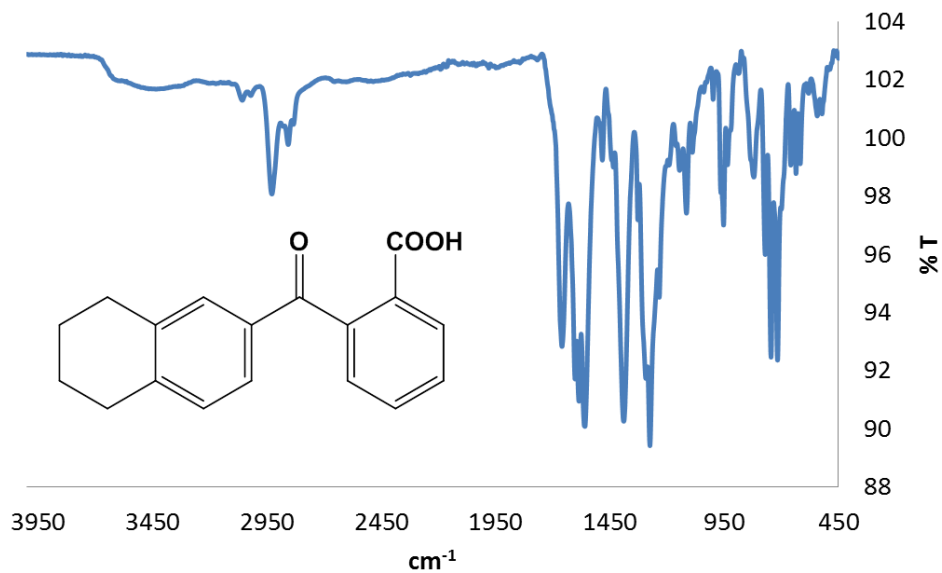

**Figure S39.** IR-ATR spectrum of **14**

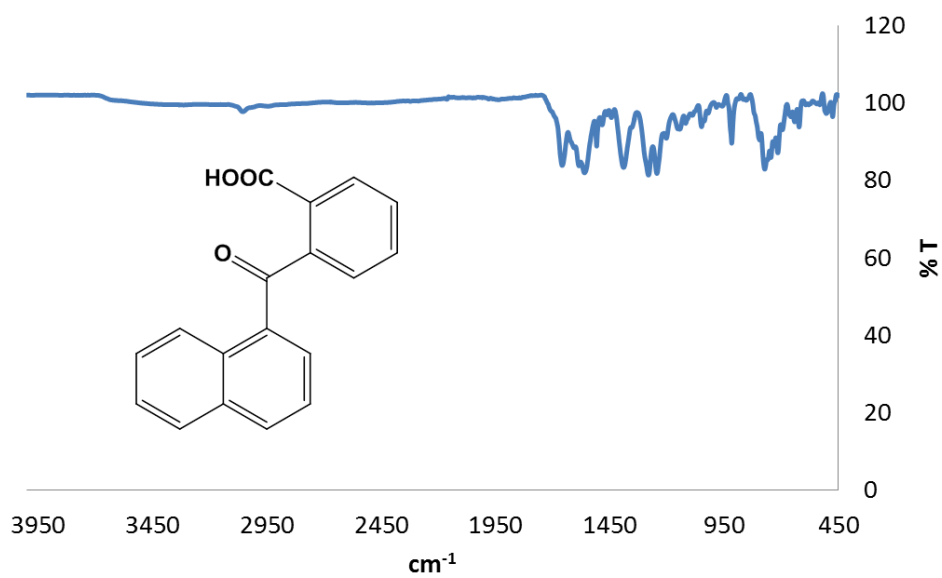

**Figure S40.** IR-ATR spectrum of **15**

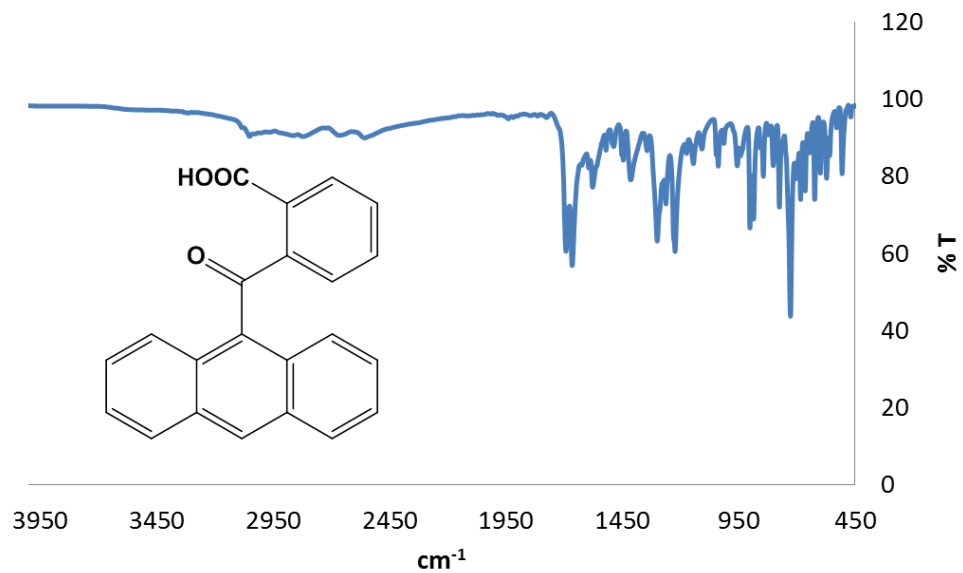

**Figure S41.** IR-ATR spectrum of **16**

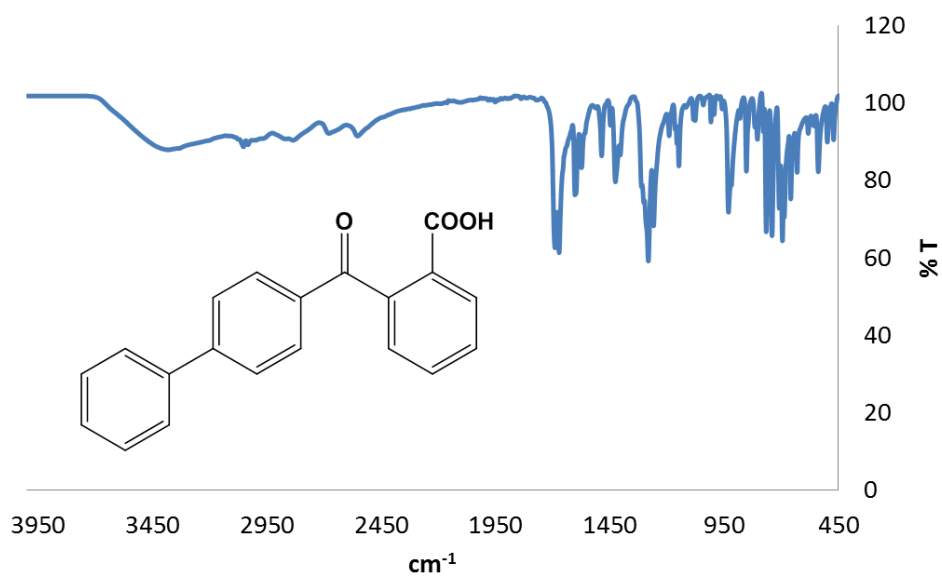

**Figure S42.** IR-ATR spectrum of **17**

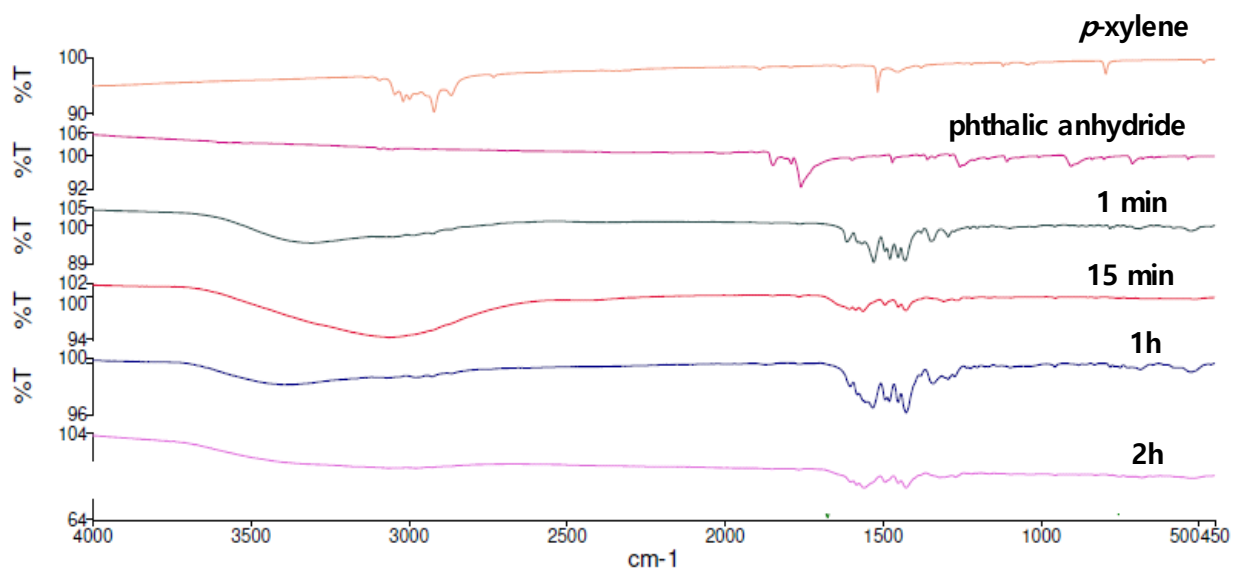

**Figure S43.** Ex situ IR spectroscopy of *p*-xylene FC reaction with phthalic anhydride

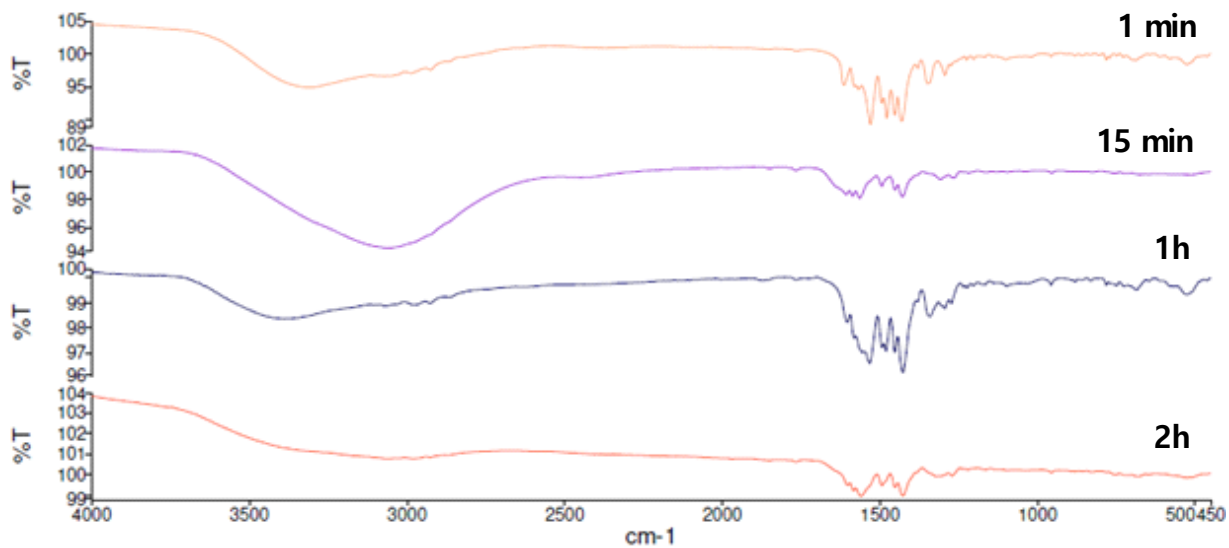

**Figure S44.** Ex situ IR spectroscopy of *p*-xylene FC reaction with phthalic anhydride (enlarged)

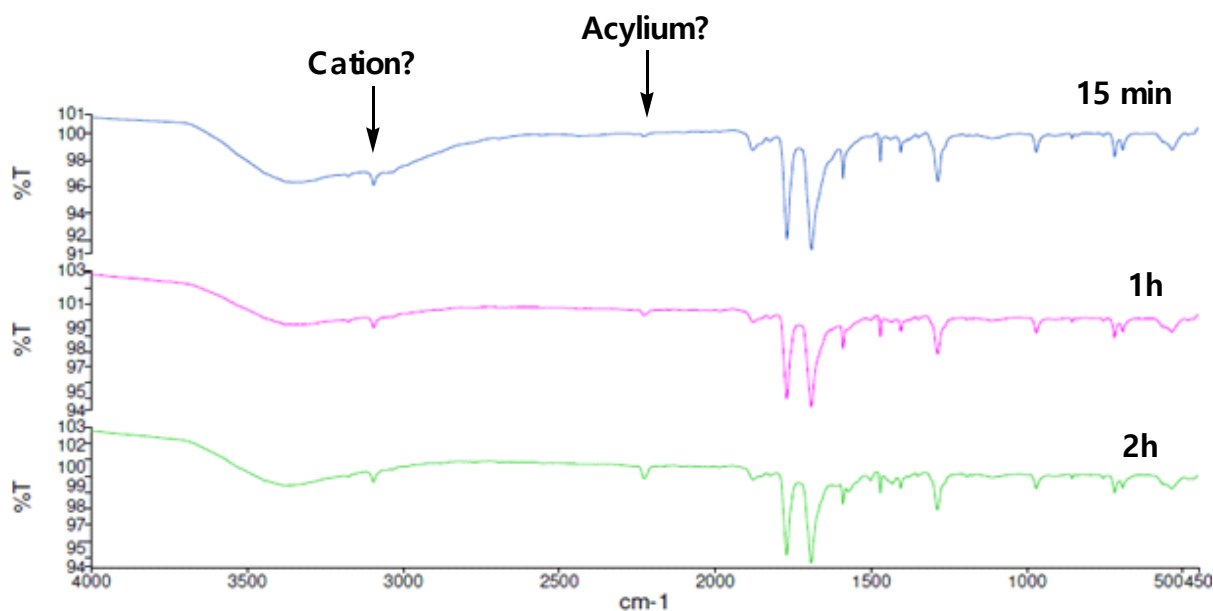

**Figure S45.** Ex situ IR spectra of phthalic anhydride complexation with  $\text{AlCl}_3$

### Computational details

All computational studies reported in this work were performed on dual core Opteron 240 personal computer under Linux operating system. Geometries of all species were optimized using Becke, three-parameter, Lee-Yang-Parr<sup>24</sup> exchange-correlation functional B3LYP/6-31G\* method as implemented in Gaussian 03 suite of programs.<sup>25</sup> All minima were verified by vibrational analysis (no imaginary frequencies were obtained). Zero point vibrational energies (ZPVE) were corrected using scaling factor  $f = 0.9614$  according to literature recommendation.<sup>26</sup>

### Cartesian coordinates of optimized structures

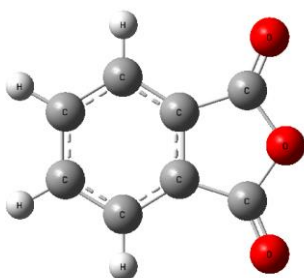

Phthalic anhydride B3LYP/6-31G\*

|   |   |             |             |             |
|---|---|-------------|-------------|-------------|
| 0 | 1 |             |             |             |
| C |   | -2.54928800 | -0.70183900 | 0.00004100  |
| C |   | -1.35304200 | -1.42658500 | -0.00004300 |
| C |   | -0.17086900 | -0.69597500 | -0.00005500 |
| C |   | -0.17081300 | 0.69594800  | -0.00007000 |

|   |             |             |             |
|---|-------------|-------------|-------------|
| C | -1.35296900 | 1.42661600  | -0.00006300 |
| C | -2.54925200 | 0.70188200  | 0.00004600  |
| H | -3.49713000 | -1.23219900 | 0.00011400  |
| H | -1.34129000 | -2.51182300 | -0.00001600 |
| H | -1.34111300 | 2.51184800  | -0.00004900 |
| H | -3.49709500 | 1.23225000  | 0.00012700  |
| C | 1.24171000  | -1.14865800 | 0.00005100  |
| O | 1.70697600  | -2.25333100 | -0.00002900 |
| C | 1.24182200  | 1.14855200  | 0.00004100  |
| O | 1.70692400  | 2.25333700  | -0.00000900 |
| O | 2.04270500  | 0.00002800  | 0.00005600  |

Zero-point correction= 0.103549  
 (Hartree/Particle)  
 Thermal correction to Energy= 0.111188  
 Thermal correction to Enthalpy= 0.112132  
 Thermal correction to Gibbs Free Energy= 0.070781  
 Sum of electronic and zero-point Energies= -532.848504  
 Sum of electronic and thermal Energies= -532.840865  
 Sum of electronic and thermal Enthalpies= -532.839920  
 Sum of electronic and thermal Free Energies= -532.881272

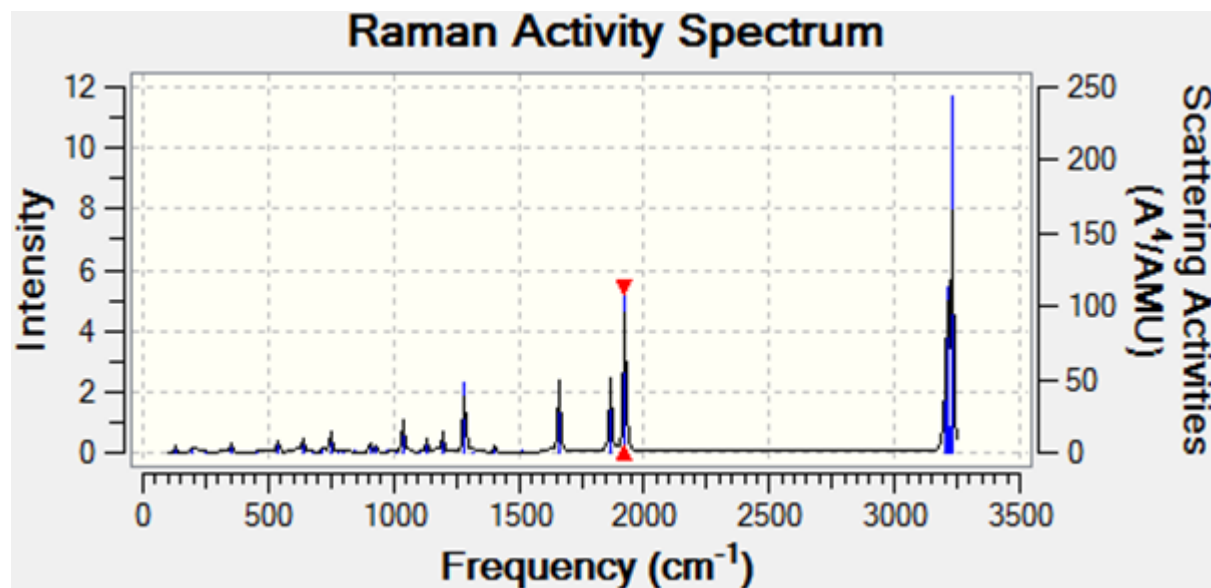

S46. Calculated Raman spectra of phthalic anhydride (B3LYP/6-31G\*)

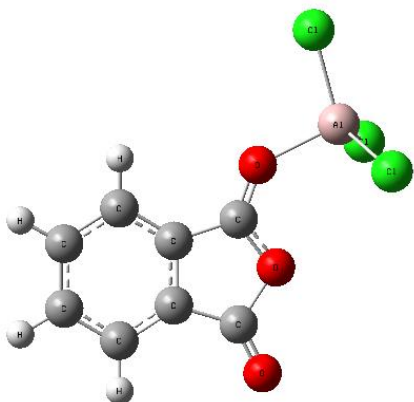

Phthalic anhydride AlCl<sub>3</sub> complex B3LYP/6-31G\*

|     |             |             |             |
|-----|-------------|-------------|-------------|
| 0 1 |             |             |             |
| C   | 4.65549200  | 1.07516100  | -0.00018200 |
| C   | 4.22001600  | -0.25647300 | -0.00008900 |
| C   | 2.84829700  | -0.46774100 | 0.00004600  |
| C   | 1.94450300  | 0.59653900  | 0.00005300  |
| C   | 2.36408200  | 1.92116000  | -0.00006600 |
| C   | 3.74597200  | 2.14336100  | -0.00016700 |
| H   | 5.72040500  | 1.28671300  | -0.00026500 |
| H   | 4.91909700  | -1.08615500 | -0.00011000 |
| H   | 1.65179300  | 2.73960900  | -0.00002200 |
| H   | 4.12269100  | 3.16142900  | -0.00023400 |
| C   | 2.07219800  | -1.72429200 | 0.00000200  |
| O   | 2.37317800  | -2.87222900 | -0.00028300 |
| C   | 0.60019500  | 0.01155900  | -0.00002700 |
| O   | -0.46954200 | 0.62513900  | 0.00016500  |
| O   | 0.67350000  | -1.32373600 | -0.00024300 |
| Al  | -2.34565000 | 0.11908600  | 0.00006300  |
| Cl  | -2.52213600 | -0.98433900 | 1.81161900  |
| Cl  | -2.52296700 | -0.98576400 | -1.81045700 |
| Cl  | -3.26326000 | 2.03605900  | -0.00085200 |

|                                              |              |
|----------------------------------------------|--------------|
| Zero-point correction=                       | 0.109866     |
| (Hartree/Particle)                           |              |
| Thermal correction to Energy=                | 0.124465     |
| Thermal correction to Enthalpy=              | 0.125409     |
| Thermal correction to Gibbs Free Energy=     | 0.064295     |
| Sum of electronic and zero-point Energies=   | -2156.117619 |
| Sum of electronic and thermal Energies=      | -2156.103020 |
| Sum of electronic and thermal Enthalpies=    | -2156.102076 |
| Sum of electronic and thermal Free Energies= | -2156.163190 |



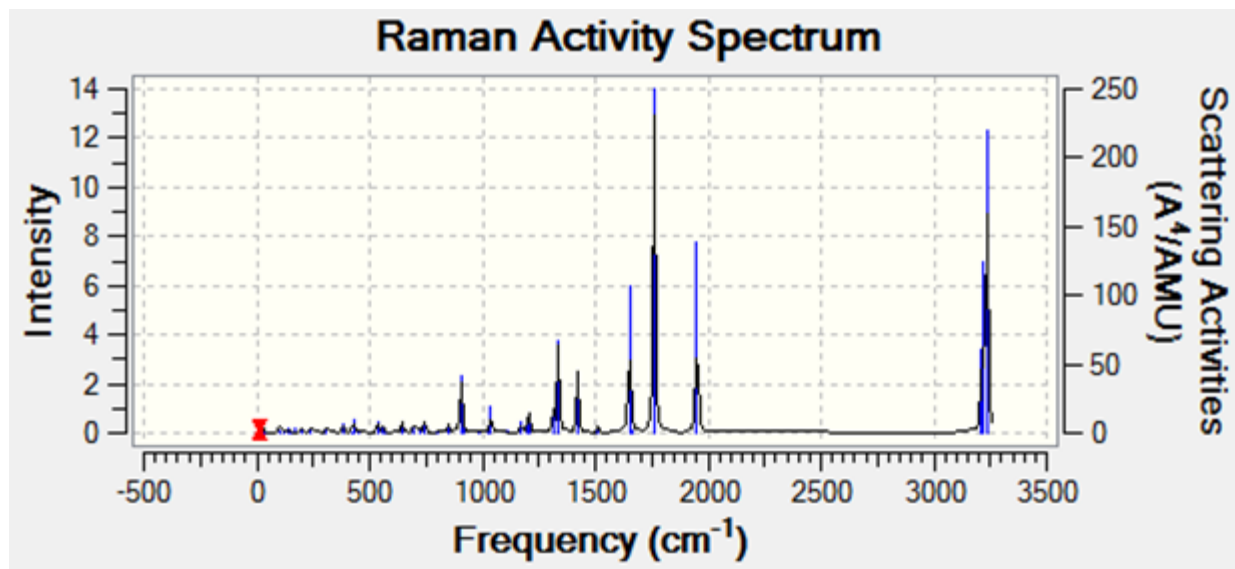

S47. Calculated Raman spectra of phthalic anhydride- $\text{AlCl}_3$  complex (B3LYP/6-31G\*)

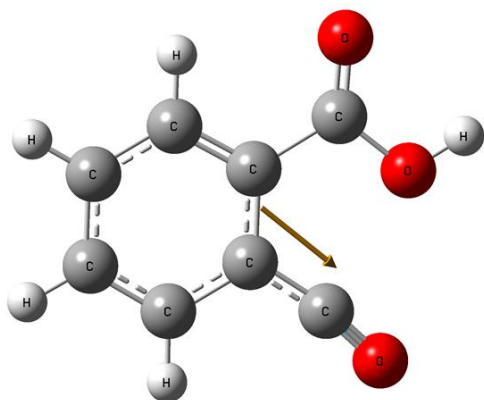

Acilium ion of phthalic anhydride B3LYP/6-31G\*

|   |             |             |             |  |
|---|-------------|-------------|-------------|--|
| 1 | 1           |             |             |  |
| C | 2.37382600  | -1.07394400 | 0.00009100  |  |
| C | 2.68358500  | 0.29132900  | 0.00003200  |  |
| C | 1.66667800  | 1.23700100  | -0.00004100 |  |
| C | 0.32142100  | 0.78169800  | -0.00003400 |  |
| C | 0.00008800  | -0.60641200 | 0.00001800  |  |
| C | 1.04264700  | -1.51828800 | 0.00008100  |  |
| H | 3.17685000  | -1.80479200 | 0.00013600  |  |
| H | 3.71772300  | 0.61945600  | 0.00004300  |  |
| H | 1.89007800  | 2.29898300  | -0.00008500 |  |
| H | 0.80262500  | -2.57668300 | 0.00011600  |  |
| C | -0.65729600 | 1.77430600  | -0.00010400 |  |
| O | -1.31179600 | 2.70354300  | -0.00019600 |  |
| C | -1.41304200 | -1.10024200 | 0.00000500  |  |
| O | -1.72872800 | -2.25951600 | -0.00045800 |  |
| O | -2.27204800 | -0.05273300 | 0.00053900  |  |

H -3.19414300 -0.38000400 0.00041500

Zero-point correction= 0.113897  
(Hartree/Particle)  
Thermal correction to Energy= 0.122844  
Thermal correction to Enthalpy= 0.123789  
Thermal correction to Gibbs Free Energy= 0.079343  
Sum of electronic and zero-point Energies= -533.145273  
Sum of electronic and thermal Energies= -533.136326  
Sum of electronic and thermal Enthalpies= -533.135381  
Sum of electronic and thermal Free Energies= -533.179827

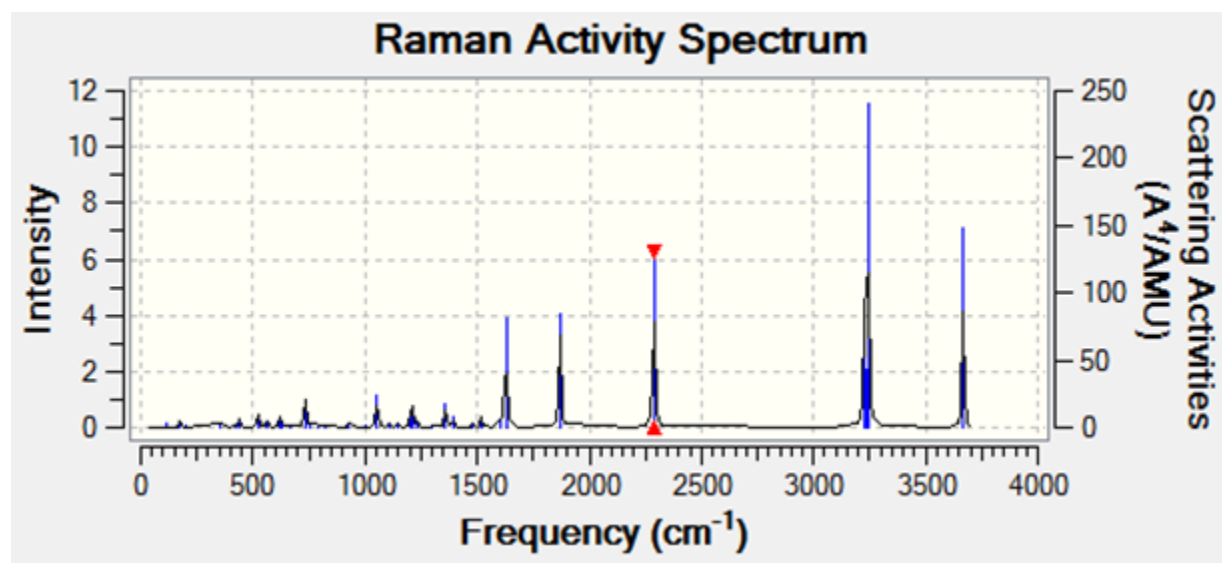

S48. Calculated Raman spectra of acilium ion of phthalic anhydride (B3LYP/6-31G\*)

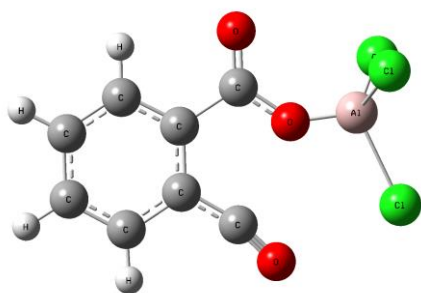

Acilium ion of phthalic anhydride AlCl<sub>3</sub> complex B3LYP/6-31G\*

Zero-point correction= 0.109054  
(Hartree/Particle)  
Thermal correction to Energy= 0.122270  
Thermal correction to Enthalpy= 0.123214  
Thermal correction to Gibbs Free Energy= 0.067462  
Sum of electronic and zero-point Energies= -2155.973537  
Sum of electronic and thermal Energies= -2155.960321

Sum of electronic and thermal Enthalpies= -2155.959377  
 Sum of electronic and thermal Free Energies= -2156.015129

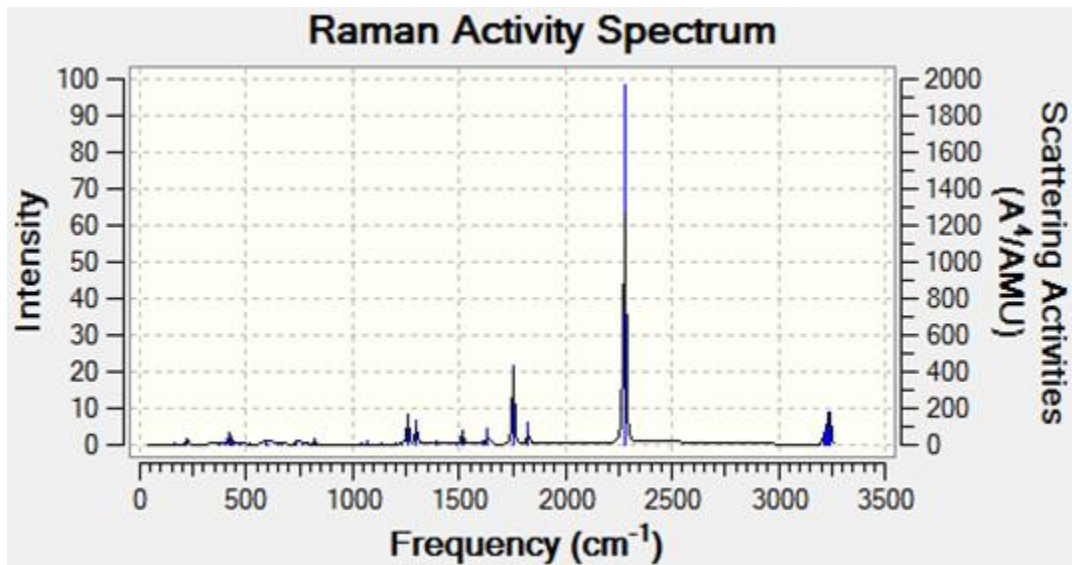

**S49.** Calculated Raman spectra of acilium ion of phthalic anhydride-AlCl<sub>3</sub> complex (B3LYP/6-31G\*)

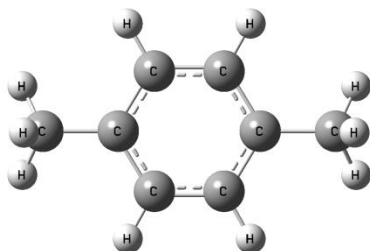

p-xylene B3LYP/6-31G\*

|   |             |             |             |  |
|---|-------------|-------------|-------------|--|
| 0 | 1           |             |             |  |
| C | 0.69739700  | 1.19847100  | -0.01172600 |  |
| C | -1.42196900 | 0.00039100  | -0.00779500 |  |
| C | 1.42197400  | 0.00038200  | -0.00740300 |  |
| H | 1.23182300  | 2.14632900  | -0.02129100 |  |
| C | -0.69718300 | -1.19820000 | -0.01186000 |  |
| C | 0.69711500  | -1.19824100 | -0.01158900 |  |
| H | -1.23170500 | -2.14602000 | -0.02172300 |  |
| H | 1.23157300  | -2.14609500 | -0.02127600 |  |
| C | -0.69735600 | 1.19847600  | -0.01180500 |  |
| H | -1.23179100 | 2.14632000  | -0.02135600 |  |
| C | -2.93300700 | -0.00029700 | 0.02134800  |  |
| H | -3.34463300 | -0.87188100 | -0.49932700 |  |
| H | -3.31366900 | -0.02935700 | 1.05145100  |  |
| H | -3.34406600 | 0.89905400  | -0.44990300 |  |
| C | 2.93303400  | -0.00032900 | 0.02118000  |  |

|   |            |             |             |
|---|------------|-------------|-------------|
| H | 3.34400800 | 0.89818700  | -0.45175100 |
| H | 3.31401600 | -0.02761800 | 1.05120900  |
| H | 3.34441400 | -0.87283800 | -0.49813100 |

|                                              |             |
|----------------------------------------------|-------------|
| Zero-point correction=                       | 0.155773    |
| (Hartree/Particle)                           |             |
| Thermal correction to Energy=                | 0.163928    |
| Thermal correction to Enthalpy=              | 0.164872    |
| Thermal correction to Gibbs Free Energy=     | 0.118778    |
| Sum of electronic and zero-point Energies=   | -310.728734 |
| Sum of electronic and thermal Energies=      | -310.720579 |
| Sum of electronic and thermal Enthalpies=    | -310.719635 |
| Sum of electronic and thermal Free Energies= | -310.765729 |

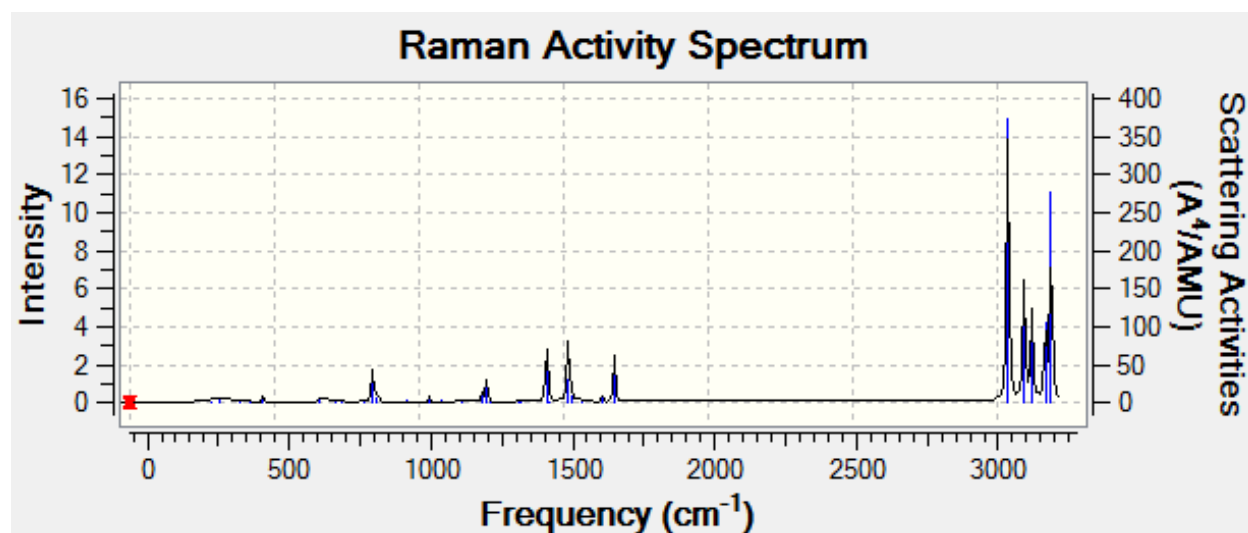

**S50.** Calculated Raman spectra of *p*-xylene (B3LYP/6-31G\*)

## References

1. <https://cameochemicals.noaa.gov/chemical/8223>
  2. Casas-Solvas, J. M.; Mooibroek, T. J.; Sandramurthy, J D.; Howgego, J. D.; Davis, A. P. *Synlett* **2014**, 25, 2591-2594.
  3. Hahma, A.; Bhat, S.; Leivo, K.; Linnanto, J.; Lahtinen, M.; Rissanen, K. *New J. Chem.* **2008**, 32, 1438-1448.
  4. Zhang, Y.; He, B.; Liu, J.; Hu, S.; Pan, L.; Zhao, Z.; Tang, B. Z. *Phys. Chem. Chem. Phys.* **2018**, 20, 9922-9929.
  5. Zhang, T.-J.; Li, S.-Y.; Yuan, W.-Y.; Wu, Q.-X.; Wang, L.; Yang, S.; Sun, Q.; Meng, F.-H. *Bioorg. Med. Chem. Lett.* **2017**, 27, 729-732.
  6. Jacob, B.; Sugunan, S.; Singh, A. P. *J. Mol. Catal. A* **1999**, 139, 43-53.
  7. Mohile, S. S.; Potdar, M. K.; Salunkhe M. M. *J. Chem. Research (S)* **2003**, 650-651.
- NMR: Rosenfeld, S.; VanDyke, S. *J. Chem. Educ.* **1991**, 68, 691-692.

- 
8. Veerman, J.; van den Bergh, T.; Orling, K. M.; Jansen, C.; Cos, P.; Maes, L.; Chatelain, E.; Ioset, J.-R.; Edink, E. E.; Tenor, H.; Seebeck, T.; de Esch, I.; Leurs, R.; Sterk, G. J. *Bioorg. Med. Chem.* **2016**, *24*, 1573-1581.
  9. Parham W. E.; Bradsher, C. K.; Edgar, K. J. *J. Org. Chem.* **1981**, *46*, 1057-1061.
  10. Zhang, T.-J.; Li, S.-Y.; Yuan, W.-Y.; Wu, Q.-X.; Wang, L.; Yang, S.; Sun, Q.; Meng, F.-H. *Bioorg. Med. Chem. Lett.* **2017**, *27*, 729-732.
  11. Yamaguchi, M.; Kamei, K.; Koga, T.; Akima, M.; Kuroki, T.; Ohi, N. *J. Med. Chem.* **1993**, *36*, 4052-4060.
  12. Dh. Hameed A. Dh.; Ovais, S.; Yaseen, R.; Rathore, P.; Samim, M.; Singh, S.; Sharma, K.; Akhtar, M.; Javed, K. *Arch. Pharm. Chem. Life Sci.* **2016**, *349*, 150-159.
  13. Fujisawa, S.; Oonishi, I.; Aoki, J.; Ohashi, Y.; Sasada, Y. *Bull. Chem. Soc. Jpn.* **1985**, *58*, 3356-3359.
  14. Mahmoodi, N. O.; Salehpour, M. *Russ. J. Org. Chem.* **2003**, *39*, 1760-1763.
  15. Valters, R.; Bace, A.; Burkevica, A.; Kampare, R. *Zhur. Org. Khim.* **1976**, *12*, 173-7.
  16. Serevičius, T.; Komskis, R.; Adoménas, P.; Adoméniéné, O.; Jankauskas, V.; Gruodis, A.; Kazlauskas, K.; Juršėnas S. *Phys. Chem. Chem. Phys.* **2014**, *16*, 7089-7101.
  17. Sartori, G.; Casnati, G.; Bigi, F.; Foglio, F. *Gazz. Chim. Ital.* **1990**, *120*, 13-19.
  18. Sakai, N.; Kobayashi, T.; Ogiwara, Y. *Chem. Lett.* **2015**, *44*, 1503-1505.
  19. Lu, G.; Franzén, R.; Zhang, Q.; Xu, Y. *Tetrahedron Lett.* **2005**, *46*, 4255-4259.
  20. Breton, G. W.; Vang, X. *J. Chem. Educ.* **1998**, *75*, 81-82.
  21. Alibert, S.; Santelli-Rouvier, C.; Castaing, M.; Berthelot, M.; Spengler, G.; Molnar, J.; Barbe, J. *Eur. J. Med. Chem.* **2003**, *38*, 253-263; Goh, Y. W.; White, J. M. *Aust. J. Chem.* **2009**, *62*, 419-424; Krivec, M.; Kranjc, K.; Polanc, S.; Kočevár, M. *Curr. Org. Chem.* **2011**, *18*, 1520-1527.
  22. Margetić, D. *High Pressure Organic Synthesis*, de Gruyter, Berlin **2019**.
  23. Margetić, D. *Microwave Assisted Cycloaddition Reactions*, Nova Science Publishers, Hauppauge **2011**.
  24. Becke, A. D. *J. Chem. Phys.* **1993**, *98*, 5648-5652; Lee, C.; Yang, W.; Parr, R. G. *Phys. Rev. B* **1988**, *37*, 785-789.
  25. GAUSSIAN 03, Revision B.03, M. J. Frisch, G. W. Trucks, H. B. Schlegel, G. E. Scuseria, M. A. Robb, J. R. Cheeseman, J. A. Montgomery, Jr., T. Vreven, K. N. Kudin, J. C. Burant, J. M. Millam, S. S. Iyengar, J. Tomasi, V. Barone, B. Mennucci, M. Cossi, G. Scalmani, N. Rega, G. A. Petersson, H. Nakatsuji, M. Hada, M. Ehara, K. Toyota, R. Fukuda, J. Hasegawa, M. Ishida, T. Nakajima, Y. Honda, O. Kitao, H. Nakai, M. Klene, X. Li, J. E. Knox, H. P. Hratchian, J. B. Cross, C. Adamo, J. Jaramillo, R. Gomperts, R. E. Stratmann, O. Yazyev, A. J. Austin, R. Cammi, C. Pomelli, J. W. Ochterski, P. Y. Ayala, K. Morokuma, G. A. Voth, P. Salvador, J. J. Dannenberg, V. G. Zakrzewski, S. Dapprich, A. D. Daniels, M. C. Strain, O. Farkas, D. K. Malick, A. D. Rabuck, K. Raghavachari, J. B. Foresman, J. V. Ortiz, Q. Cui, A. G. Baboul, S. Clifford, J. Cioslowski, B. B. Stefanov, G. Liu, A. Liashenko, P. Piskorz, I. Komaromi, R. L. Martin, D. J. Fox, T. Keith, M. A. Al-Laham, C. Y. Peng, A. Nanayakkara, M. Challacombe, P. M. W. Gill, B. Johnson, W. Chen, M. W. Wong, C. Gonzalez, and J. A. Pople, Gaussian Inc., Wallingford CT, 2004.
  26. Scott, A. P.; Radom, L. *J. Phys. Chem.* **1996**, *100*, 16502-16513.
